# Supplementary material for: A computational study of cycloaddition reactions of d8 metal tetroxide (Iron, Ruthenium, Osmium) complexes with C60
Source: Royal Society of Chemistry journal article supplement (doi:10.1039/c0dt01445a), 2011-01-01
Supplement: c0dt01445a.pdf [file c0dt01445a.pdf]

# Supporting Information

## A Computational Study of Cycloaddition Reactions of $d^8$ Metal Tetroxide (Iron, Ruthenium, Osmium) Complexes with $C_{60}$ .

Jeng-Horng Sheu and Ming-Der Su\*

Department of Applied Chemistry, National Chiayi University, Chiayi 60004,  
Taiwan

midesu@mail.ncyu.edu.tw

(All geometries were calculated B3LYP/LANL2DZ)

| Atomic<br>Number | Coordinates (Angstroms) |           |           |
|------------------|-------------------------|-----------|-----------|
|                  | X                       | Y         | Z         |
| 26               | -1.698769               | -0.072691 | -0.106217 |
| 8                | -2.593733               | -1.412301 | -0.259541 |
| 8                | -2.721138               | 1.181191  | -0.078130 |
| 8                | -1.057206               | 0.057594  | -1.619787 |
| 8                | -1.246078               | -0.154367 | 1.477107  |
| 7                | 0.209768                | -1.654429 | -0.113406 |
| 6                | 0.870443                | -1.938530 | 1.026278  |
| 6                | 0.624428                | -2.159663 | -1.293555 |
| 6                | 2.006389                | -2.769406 | 1.029279  |
| 1                | 0.472811                | -1.474306 | 1.925451  |
| 6                | 1.743636                | -3.007163 | -1.376382 |
| 1                | 0.050960                | -1.855661 | -2.165451 |
| 6                | 2.443802                | -3.316223 | -0.193147 |
| 1                | 2.524513                | -2.976344 | 1.960498  |
| 1                | 2.049818                | -3.408484 | -2.337470 |
| 1                | 3.311165                | -3.970841 | -0.223523 |
| 7                | 0.050053                | 1.668542  | 0.136471  |
| 6                | 0.821491                | 2.005659  | -0.915581 |
| 6                | 0.271791                | 2.207279  | 1.353472  |
| 6                | 1.877234                | 2.927233  | -0.787184 |
| 1                | 0.577104                | 1.509689  | -1.851636 |
| 6                | 1.298796                | 3.144716  | 1.564612  |
| 1                | -0.378832               | 1.858137  | 2.151137  |
| 6                | 2.112956                | 3.509309  | 0.473758  |
| 1                | 2.488226                | 3.175522  | -1.649401 |
| 1                | 1.449492                | 3.571034  | 2.551603  |
| 1                | 2.913574                | 4.233062  | 0.603909  |

SCF Done: E(RB+HF-LYP) = -920.552849083 A.U.

Fe-Rea(Triplet)

---

| Atomic<br>Number | Coordinates (Angstroms) |           |           |
|------------------|-------------------------|-----------|-----------|
|                  | X                       | Y         | Z         |
| 26               | -1.257882               | -0.050882 | -0.081441 |
| 8                | -2.430559               | -1.295447 | -0.146283 |
| 8                | -2.515661               | 1.104921  | -0.196186 |
| 8                | -0.888408               | 0.040868  | -1.915314 |
| 8                | -1.135439               | -0.121764 | 1.781092  |
| 7                | 0.236371                | -1.548323 | -0.143936 |
| 6                | 0.838881                | -1.976981 | 0.997778  |
| 6                | 0.513673                | -2.170129 | -1.323260 |
| 6                | 1.753453                | -3.042456 | 0.993230  |
| 1                | 0.536538                | -1.464894 | 1.903772  |
| 6                | 1.419060                | -3.238852 | -1.398467 |
| 1                | -0.020556               | -1.801718 | -2.194507 |
| 6                | 2.051051                | -3.686103 | -0.221913 |
| 1                | 2.205950                | -3.361547 | 1.927971  |
| 1                | 1.607810                | -3.710561 | -2.357696 |
| 1                | 2.747785                | -4.520037 | -0.250301 |
| 7                | 0.096049                | 1.559032  | 0.175409  |
| 6                | 0.811406                | 2.032384  | -0.880597 |
| 6                | 0.153850                | 2.209882  | 1.370301  |
| 6                | 1.617707                | 3.176869  | -0.772402 |
| 1                | 0.683282                | 1.488214  | -1.808766 |
| 6                | 0.942072                | 3.357136  | 1.547274  |
| 1                | -0.459772               | 1.799003  | 2.167036  |
| 6                | 1.686019                | 3.853704  | 0.458970  |
| 1                | 2.163374                | 3.529580  | -1.643304 |
| 1                | 0.954991                | 3.850474  | 2.514058  |
| 1                | 2.293345                | 4.749251  | 0.565158  |

---

SCF Done: E(UB+HF-LYP) = -920.637297424 A.U.

---

---

Ru-Rea(Singlet)

---

# Supplementary Material (ESI) for Dalton Transactions  
# This journal is (c) The Royal Society of Chemistry 2011

| Atomic | Coordinates (Angstroms) |           |           |
|--------|-------------------------|-----------|-----------|
| Number | X                       | Y         | Z         |
| 44     | -1.378073               | -0.056998 | -0.091759 |
| 8      | -2.383103               | -1.479430 | -0.262049 |
| 8      | -2.509034               | 1.277970  | -0.064976 |
| 8      | -0.667646               | 0.082492  | -1.713195 |
| 8      | -0.880087               | -0.146528 | 1.610175  |
| 7      | 0.465446                | -1.734714 | -0.102826 |
| 6      | 1.050444                | -2.131139 | 1.051816  |
| 6      | 0.882005                | -2.252838 | -1.282934 |
| 6      | 2.099110                | -3.067779 | 1.066938  |
| 1      | 0.660410                | -1.671313 | 1.954501  |
| 6      | 1.918409                | -3.199459 | -1.349384 |
| 1      | 0.375933                | -1.879604 | -2.168023 |
| 6      | 2.541097                | -3.610392 | -0.154325 |
| 1      | 2.551827                | -3.356904 | 2.010717  |
| 1      | 2.225265                | -3.596796 | -2.311781 |
| 1      | 3.350776                | -4.335673 | -0.174877 |
| 7      | 0.304668                | 1.763909  | 0.154899  |
| 6      | 1.004485                | 2.211824  | -0.913896 |
| 6      | 0.513708                | 2.311290  | 1.375993  |
| 6      | 1.962615                | 3.234178  | -0.795677 |
| 1      | 0.779644                | 1.723526  | -1.856999 |
| 6      | 1.447778                | 3.342358  | 1.573222  |
| 1      | -0.072689               | 1.892914  | 2.188293  |
| 6      | 2.188215                | 3.808904  | 0.469232  |
| 1      | 2.512085                | 3.563804  | -1.672464 |
| 1      | 1.587863                | 3.760980  | 2.564863  |
| 1      | 2.922797                | 4.600923  | 0.592223  |

SCF Done: E(RB+HF-LYP) = -891.144058551 A.U.

Ru-Rea(Triplet)

Atomic Coordinates (Angstroms)

| Number | X         | Y         | Z         |
|--------|-----------|-----------|-----------|
| 44     | -1.181684 | -0.049148 | -0.080134 |
| 8      | -2.457166 | -1.398084 | -0.259261 |
| 8      | -2.577053 | 1.188089  | -0.083314 |
| 8      | -0.594945 | 0.085038  | -1.746021 |
| 8      | -0.816793 | -0.143701 | 1.650438  |
| 7      | 0.434234  | -1.753324 | -0.099818 |
| 6      | 0.936445  | -2.242653 | 1.061499  |
| 6      | 0.841655  | -2.274701 | -1.284241 |
| 6      | 1.887170  | -3.276463 | 1.076111  |
| 1      | 0.557238  | -1.777349 | 1.965466  |
| 6      | 1.783329  | -3.314428 | -1.346437 |
| 1      | 0.402416  | -1.828275 | -2.170614 |
| 6      | 2.319454  | -3.822035 | -0.147216 |
| 1      | 2.273272  | -3.638712 | 2.024079  |
| 1      | 2.084014  | -3.709621 | -2.311484 |
| 1      | 3.054104  | -4.623339 | -0.165699 |
| 7      | 0.270003  | 1.782549  | 0.148059  |
| 6      | 0.878968  | 2.320080  | -0.938631 |
| 6      | 0.473141  | 2.327316  | 1.373894  |
| 6      | 1.734034  | 3.429204  | -0.831578 |
| 1      | 0.662749  | 1.831220  | -1.882988 |
| 6      | 1.308395  | 3.441215  | 1.555784  |
| 1      | -0.039520 | 1.839110  | 2.196555  |
| 6      | 1.953784  | 4.000359  | 0.435896  |
| 1      | 2.210531  | 3.828805  | -1.721683 |
| 1      | 1.445428  | 3.852791  | 2.550644  |
| 1      | 2.610063  | 4.859889  | 0.548122  |

SCF Done: E(UB+HF-LYP) = -891.149926834 A.U.

Os-Rea(Singlet)

| Atomic | Coordinates (Angstroms) |   |   |
|--------|-------------------------|---|---|
| Number | X                       | Y | Z |

---

|    |           |           |           |
|----|-----------|-----------|-----------|
| 76 | -1.144059 | -0.043139 | -0.091760 |
| 8  | -2.165028 | -1.461969 | -0.252404 |
| 8  | -2.281495 | 1.293261  | -0.118677 |
| 8  | -0.443212 | 0.062512  | -1.731436 |
| 8  | -0.724930 | -0.106632 | 1.643668  |
| 7  | 0.680956  | -1.653596 | -0.024503 |
| 6  | 1.176220  | -2.083708 | 1.162019  |
| 6  | 1.180118  | -2.148166 | -1.184335 |
| 6  | 2.211406  | -3.030292 | 1.229441  |
| 1  | 0.721946  | -1.641815 | 2.042274  |
| 6  | 2.209871  | -3.102409 | -1.194687 |
| 1  | 0.741236  | -1.748287 | -2.092264 |
| 6  | 2.738659  | -3.548656 | 0.031919  |
| 1  | 2.588298  | -3.347166 | 2.197026  |
| 1  | 2.583251  | -3.479501 | -2.141432 |
| 1  | 3.540998  | -4.281735 | 0.053590  |
| 7  | 0.542636  | 1.700023  | 0.139160  |
| 6  | 1.111448  | 2.245960  | -0.963691 |
| 6  | 0.888695  | 2.150161  | 1.370657  |
| 6  | 2.065498  | 3.272054  | -0.869087 |
| 1  | 0.786687  | 1.828670  | -1.910907 |
| 6  | 1.835810  | 3.172265  | 1.542653  |
| 1  | 0.393561  | 1.661255  | 2.202640  |
| 6  | 2.437408  | 3.741968  | 0.404739  |
| 1  | 2.501462  | 3.685291  | -1.773005 |
| 1  | 2.090222  | 3.506541  | 2.543515  |
| 1  | 3.176598  | 4.532271  | 0.508039  |

---

SCF Done: E(RB+HF-LYP) = -888.427132220 A.U.

---

---

Os-Rea(Triplet)

---

| Atomic<br>Number | Coordinates (Angstroms) |   |   |
|------------------|-------------------------|---|---|
|                  | X                       | Y | Z |

---

# Supplementary Material (ESI) for Dalton Transactions  
# This journal is (c) The Royal Society of Chemistry 2011

|    |           |           |           |
|----|-----------|-----------|-----------|
| 76 | -0.919722 | -0.038286 | -0.062599 |
| 8  | -2.212164 | -1.376795 | -0.239104 |
| 8  | -2.332483 | 1.184841  | -0.072312 |
| 8  | -0.356406 | 0.093950  | -1.746817 |
| 8  | -0.581957 | -0.133163 | 1.683183  |
| 7  | 0.665301  | -1.724903 | -0.074333 |
| 6  | 1.089960  | -2.277794 | 1.092562  |
| 6  | 1.108232  | -2.224393 | -1.258217 |
| 6  | 1.987808  | -3.355642 | 1.111721  |
| 1  | 0.687107  | -1.827945 | 1.993526  |
| 6  | 2.002860  | -3.303377 | -1.311614 |
| 1  | 0.727521  | -1.729991 | -2.145644 |
| 6  | 2.453414  | -3.879765 | -0.108592 |
| 1  | 2.305913  | -3.770821 | 2.063206  |
| 1  | 2.331164  | -3.678347 | -2.275710 |
| 1  | 3.145517  | -4.717802 | -0.121873 |
| 7  | 0.501527  | 1.775245  | 0.154471  |
| 6  | 1.028148  | 2.370950  | -0.948059 |
| 6  | 0.743753  | 2.299213  | 1.384908  |
| 6  | 1.829630  | 3.518385  | -0.851926 |
| 1  | 0.784867  | 1.897520  | -1.893142 |
| 6  | 1.532597  | 3.446850  | 1.552495  |
| 1  | 0.292486  | 1.768264  | 2.216246  |
| 6  | 2.087637  | 4.068190  | 0.417614  |
| 1  | 2.234289  | 3.966062  | -1.754487 |
| 1  | 1.700723  | 3.838897  | 2.550393  |
| 1  | 2.701646  | 4.959306  | 0.519482  |

-----  
SCF Done: E(UB+HF-LYP) = -888.402294572 A.U.  
-----  
-----

C60-Rea

-----  
Atomic Coordinates (Angstroms)  
Number X Y Z  
-----  
6 1.184276 0.384795 3.350509

# Supplementary Material (ESI) for Dalton Transactions  
# This journal is (c) The Royal Society of Chemistry 2011

|   |           |           |           |
|---|-----------|-----------|-----------|
| 6 | 0.731923  | -1.007405 | 3.350509  |
| 6 | 2.618417  | -1.589131 | 1.842564  |
| 6 | 1.434141  | -1.973926 | 2.612153  |
| 6 | -1.434141 | -1.973926 | 2.612153  |
| 6 | 0.702218  | -2.981331 | 1.842564  |
| 6 | -0.731923 | -1.007405 | 3.350509  |
| 6 | -0.702218 | -2.981331 | 1.842564  |
| 6 | 1.434141  | -3.219148 | 0.597342  |
| 6 | -1.184276 | 0.384795  | 3.350509  |
| 6 | -2.618417 | -2.358721 | 0.597342  |
| 6 | -2.618417 | -1.589131 | 1.842564  |
| 6 | 0.731923  | -3.447312 | -0.597342 |
| 6 | 2.618417  | -2.358721 | 0.597342  |
| 6 | 1.184276  | -2.824701 | -1.842564 |
| 6 | -0.731923 | -3.447312 | -0.597342 |
| 6 | -1.184276 | -2.824701 | -1.842564 |
| 6 | -1.434141 | -3.219148 | 0.597342  |
| 6 | -3.504765 | 0.369178  | 0.597342  |
| 6 | -2.320489 | 0.753973  | 2.612153  |
| 6 | 0.000000  | -2.439907 | -2.612153 |
| 6 | -2.320489 | -1.999194 | -1.842564 |
| 6 | -2.320489 | -0.753973 | -2.612153 |
| 6 | -3.052412 | -1.761378 | -0.597342 |
| 6 | -3.504765 | -0.369178 | -0.597342 |
| 6 | -2.320489 | 1.999194  | 1.842564  |
| 6 | 0.000000  | 1.245222  | 3.350509  |
| 6 | -3.052412 | -0.253433 | 1.842564  |
| 6 | -3.052412 | 1.761378  | 0.597342  |
| 6 | -3.052412 | 0.253433  | -1.842564 |
| 6 | 3.504765  | -0.369178 | -0.597342 |
| 6 | 0.000000  | -1.245222 | -3.350509 |
| 6 | 0.000000  | 2.439907  | 2.612153  |
| 6 | 3.052412  | 1.761378  | 0.597342  |
| 6 | 2.320489  | -0.753973 | -2.612153 |
| 6 | 3.052412  | -0.253433 | 1.842564  |
| 6 | 2.320489  | -1.999194 | -1.842564 |
| 6 | 3.052412  | 0.253433  | -1.842564 |
| 6 | 3.052412  | -1.761378 | -0.597342 |
| 6 | 2.320489  | 0.753973  | 2.612153  |
| 6 | -1.184276 | 2.824701  | 1.842564  |



# Supplementary Material (ESI) for Dalton Transactions  
# This journal is (c) The Royal Society of Chemistry 2011

|   |           |           |           |
|---|-----------|-----------|-----------|
| 6 | -0.731923 | 3.447312  | 0.597342  |
| 6 | -2.618417 | 2.358721  | -0.597342 |
| 6 | -1.434141 | 3.219148  | -0.597342 |
| 6 | 1.434141  | 3.219148  | -0.597342 |
| 6 | -0.702218 | 2.981331  | -1.842564 |
| 6 | 0.731923  | 3.447312  | 0.597342  |
| 6 | 0.702218  | 2.981331  | -1.842564 |
| 6 | -1.434141 | 1.973926  | -2.612153 |
| 6 | 1.184276  | 2.824701  | 1.842564  |
| 6 | 2.618417  | 1.589131  | -1.842564 |
| 6 | 2.618417  | 2.358721  | -0.597342 |
| 6 | -0.731923 | 1.007405  | -3.350509 |
| 6 | -2.618417 | 1.589131  | -1.842564 |
| 6 | -1.184276 | -0.384795 | -3.350509 |
| 6 | 0.731923  | 1.007405  | -3.350509 |
| 6 | 1.184276  | -0.384795 | -3.350509 |
| 6 | 1.434141  | 1.973926  | -2.612153 |
| 6 | 3.504765  | 0.369178  | 0.597342  |
| 6 | 2.320489  | 1.999194  | 1.842564  |

-----  
SCF Done: E(RB+HF-LYP) = -2285.72210837 A.U.  
-----  
-----

Fe-PC

-----

| Atomic<br>Number | Coordinates (Angstroms) |           |           |
|------------------|-------------------------|-----------|-----------|
|                  | X                       | Y         | Z         |
| 6                | 0.957196                | 0.686670  | 0.014212  |
| 6                | 0.956597                | -0.735971 | -0.006561 |
| 8                | 3.482022                | -1.162524 | 0.001305  |
| 26               | 4.430669                | 0.150694  | -0.010357 |
| 8                | 3.369102                | 1.374914  | -0.006583 |
| 6                | 0.472145                | 1.427384  | -1.158779 |
| 6                | -0.267772               | 2.598900  | -0.690110 |
| 6                | -0.268943               | 2.577360  | 0.772917  |
| 6                | 0.470736                | 1.392702  | 1.208122  |

# Supplementary Material (ESI) for Dalton Transactions  
# This journal is (c) The Royal Society of Chemistry 2011

|   |           |           |           |
|---|-----------|-----------|-----------|
| 6 | 0.029421  | 0.673214  | 2.327935  |
| 6 | 0.029972  | -0.793957 | 2.305969  |
| 6 | 0.473088  | -1.479438 | 1.165289  |
| 6 | -0.265926 | -2.652277 | 0.695650  |
| 6 | -0.264717 | -2.630764 | -0.767158 |
| 6 | 0.475340  | -1.444757 | -1.200834 |
| 6 | 0.033799  | -0.725706 | -2.321399 |
| 6 | 0.033248  | 0.741504  | -2.300248 |
| 6 | -1.150716 | 1.201446  | -3.025568 |
| 6 | -1.855722 | 2.331549  | -2.579537 |
| 6 | -1.404206 | 3.045052  | -1.385565 |
| 6 | -2.589920 | 3.487152  | -0.649201 |
| 6 | -2.591061 | 3.466419  | 0.754468  |
| 6 | -1.406618 | 3.002686  | 1.479426  |
| 6 | -1.860001 | 2.254397  | 2.651243  |
| 6 | -1.155615 | 1.111596  | 3.064635  |
| 6 | -1.888284 | -0.079139 | 3.498654  |
| 6 | -1.154674 | -1.255675 | 3.029393  |
| 6 | -1.857936 | -2.386401 | 2.582079  |
| 6 | -1.403455 | -3.099538 | 1.388919  |
| 6 | -2.587834 | -3.543163 | 0.650897  |
| 6 | -2.586648 | -3.522447 | -0.752642 |
| 6 | -1.401129 | -3.057232 | -1.475297 |
| 6 | -1.853513 | -2.309304 | -2.647841 |
| 6 | -1.149465 | -1.165856 | -3.060182 |
| 6 | -1.882461 | 0.023987  | -3.495744 |
| 6 | -3.286845 | 0.023379  | -3.501216 |
| 6 | -4.021012 | 1.200648  | -3.033615 |
| 6 | -3.319149 | 2.330818  | -2.582233 |
| 6 | -3.773735 | 3.045629  | -1.388415 |
| 6 | -4.911402 | 2.601370  | -0.694230 |
| 6 | -4.912527 | 2.579765  | 0.769381  |
| 6 | -3.775998 | 3.003225  | 1.478357  |
| 6 | -3.323546 | 2.253641  | 2.651521  |
| 6 | -4.026230 | 1.110616  | 3.067885  |
| 6 | -3.292681 | -0.079883 | 3.501775  |
| 6 | -4.025027 | -1.257802 | 3.032752  |
| 6 | -3.321418 | -2.387432 | 2.582648  |
| 6 | -3.773430 | -3.102721 | 1.388153  |
| 6 | -4.910402 | -2.659417 | 0.692098  |

# Supplementary Material (ESI) for Dalton Transactions  
# This journal is (c) The Royal Society of Chemistry 2011

|   |           |           |           |
|---|-----------|-----------|-----------|
| 6 | -4.909096 | -2.637821 | -0.771549 |
| 6 | -3.770924 | -3.060332 | -1.478553 |
| 6 | -3.317094 | -2.310290 | -2.650891 |
| 6 | -4.020054 | -1.167796 | -3.068357 |
| 6 | -5.205136 | -0.727179 | -2.331998 |
| 6 | -5.205695 | 0.737395  | -2.310423 |
| 6 | -5.642162 | 1.423093  | -1.164463 |
| 6 | -6.094894 | 0.673226  | 0.008296  |
| 6 | -5.644120 | 1.388262  | 1.203416  |
| 6 | -5.209564 | 0.668952  | 2.329342  |
| 6 | -5.209054 | -0.795625 | 2.307784  |
| 6 | -5.642993 | -1.481682 | 1.161097  |
| 6 | -6.094373 | -0.732209 | -0.012443 |
| 6 | -5.641003 | -1.446840 | -1.206825 |
| 7 | 6.711563  | -1.880441 | 0.049402  |
| 6 | 7.253022  | -2.334536 | 1.203820  |
| 1 | 6.955615  | -1.803217 | 2.104502  |
| 6 | 8.141597  | -3.425307 | 1.244085  |
| 1 | 8.548926  | -3.761410 | 2.193058  |
| 6 | 8.478589  | -4.063429 | 0.034322  |
| 1 | 9.153570  | -4.915435 | 0.030239  |
| 6 | 7.926591  | -3.583343 | -1.169699 |
| 1 | 8.164758  | -4.045323 | -2.123491 |
| 6 | 7.047437  | -2.484739 | -1.114463 |
| 1 | 6.594218  | -2.068650 | -2.012211 |
| 8 | 5.252172  | 0.200731  | -1.383652 |
| 7 | 6.703617  | 2.273871  | -0.047991 |
| 6 | 7.224983  | 2.734236  | -1.209315 |
| 1 | 6.918799  | 2.203243  | -2.107291 |
| 6 | 8.104899  | 3.831890  | -1.258973 |
| 1 | 8.497483  | 4.172683  | -2.212522 |
| 6 | 8.453613  | 4.469925  | -0.052506 |
| 1 | 9.123895  | 5.325570  | -0.055376 |
| 6 | 7.919576  | 3.984878  | 1.157475  |
| 1 | 8.165755  | 4.447132  | 2.108966  |
| 6 | 7.048433  | 2.879758  | 1.112341  |
| 1 | 6.609131  | 2.460034  | 2.014601  |
| 8 | 5.274984  | 0.193604  | 1.347986  |

-----  
SCF Done: E(RB+HF-LYP) = -3206.30728830 A.U.

Ru-PC

| Atomic<br>Number | Coordinates (Angstroms) |           |           |
|------------------|-------------------------|-----------|-----------|
|                  | X                       | Y         | Z         |
| 6                | 0.898862                | 0.669305  | 0.012092  |
| 6                | 0.896148                | -0.748355 | -0.006537 |
| 8                | 3.268851                | -1.369327 | 0.010470  |
| 44               | 4.423495                | -0.031673 | 0.001258  |
| 8                | 3.252636                | 1.291875  | -0.004033 |
| 6                | 0.416777                | 1.410872  | -1.161570 |
| 6                | -0.317747               | 2.585432  | -0.694674 |
| 6                | -0.318655               | 2.565901  | 0.768490  |
| 6                | 0.415775                | 1.379414  | 1.204847  |
| 6                | -0.023240               | 0.664513  | 2.327695  |
| 6                | -0.025992               | -0.802305 | 2.308219  |
| 6                | 0.410068                | -1.488267 | 1.166495  |
| 6                | -0.328438               | -2.660102 | 0.698654  |
| 6                | -0.327403               | -2.640557 | -0.764530 |
| 6                | 0.412177                | -1.456794 | -1.199916 |
| 6                | -0.022858               | -0.740217 | -2.323341 |
| 6                | -0.020171               | 0.726606  | -2.303866 |
| 6                | -1.203294               | 1.189016  | -3.029528 |
| 6                | -1.905169               | 2.321965  | -2.584794 |
| 6                | -1.452228               | 3.035282  | -1.391328 |
| 6                | -2.636569               | 3.481416  | -0.654585 |
| 6                | -2.637468               | 3.462589  | 0.749423  |
| 6                | -1.454147               | 2.996800  | 1.475513  |
| 6                | -1.908571               | 2.251881  | 2.649000  |
| 6                | -1.207211               | 1.107397  | 3.063978  |
| 6                | -1.942331               | -0.081068 | 3.499907  |
| 6                | -1.211793               | -1.260257 | 3.032330  |
| 6                | -1.917398               | -2.390536 | 2.586677  |
| 6                | -1.465590               | -3.105568 | 1.393823  |
| 6                | -2.650677               | -3.547222 | 0.655546  |

# Supplementary Material (ESI) for Dalton Transactions  
# This journal is (c) The Royal Society of Chemistry 2011

|   |           |           |           |
|---|-----------|-----------|-----------|
| 6 | -2.649697 | -3.528404 | -0.748452 |
| 6 | -1.463670 | -3.067088 | -1.473012 |
| 6 | -1.913786 | -2.320447 | -2.647045 |
| 6 | -1.207540 | -1.178633 | -3.061127 |
| 6 | -1.937634 | 0.012587  | -3.498038 |
| 6 | -3.342449 | 0.015291  | -3.502430 |
| 6 | -4.073408 | 1.194936  | -3.036130 |
| 6 | -3.368824 | 2.324073  | -2.586412 |
| 6 | -3.821404 | 3.041414  | -1.393093 |
| 6 | -4.959865 | 2.600515  | -0.697796 |
| 6 | -4.960751 | 2.580909  | 0.765882  |
| 6 | -3.823183 | 3.002918  | 1.474312  |
| 6 | -3.372328 | 2.254018  | 2.648783  |
| 6 | -4.077585 | 1.113210  | 3.066906  |
| 6 | -3.347151 | -0.078459 | 3.502504  |
| 6 | -4.081949 | -1.255330 | 3.035232  |
| 6 | -3.381062 | -2.387127 | 2.586428  |
| 6 | -3.834816 | -3.102747 | 1.392511  |
| 6 | -4.970701 | -2.657510 | 0.695763  |
| 6 | -4.969626 | -2.637913 | -0.767904 |
| 6 | -3.832749 | -3.064255 | -1.474849 |
| 6 | -3.377550 | -2.317076 | -2.648751 |
| 6 | -4.077935 | -1.173609 | -3.067776 |
| 6 | -5.261796 | -0.729047 | -2.331098 |
| 6 | -5.259070 | 0.735246  | -2.311535 |
| 6 | -5.693462 | 1.423379  | -1.166387 |
| 6 | -6.147962 | 0.676214  | 0.007627  |
| 6 | -5.695023 | 1.391768  | 1.201813  |
| 6 | -5.262156 | 0.673132  | 2.328683  |
| 6 | -5.264951 | -0.791164 | 2.309135  |
| 6 | -5.700471 | -1.477639 | 1.163428  |
| 6 | -6.150610 | -0.728758 | -0.011179 |
| 6 | -5.698850 | -1.446020 | -1.204795 |
| 7 | 5.994799  | -2.081322 | 0.017650  |
| 6 | 6.452412  | -2.599125 | 1.182865  |
| 1 | 6.266494  | -2.000350 | 2.069426  |
| 6 | 7.120770  | -3.835412 | 1.237698  |
| 1 | 7.467724  | -4.222532 | 2.190948  |
| 6 | 7.317872  | -4.553438 | 0.042814  |
| 1 | 7.818882  | -5.518251 | 0.054025  |

# Supplementary Material (ESI) for Dalton Transactions  
# This journal is (c) The Royal Society of Chemistry 2011

|   |          |           |           |
|---|----------|-----------|-----------|
| 6 | 6.853418 | -4.002902 | -1.167240 |
| 1 | 6.987465 | -4.522983 | -2.110835 |
| 6 | 6.198461 | -2.759573 | -1.137957 |
| 1 | 5.824338 | -2.282821 | -2.038826 |
| 8 | 5.137446 | -0.043652 | -1.609971 |
| 7 | 5.991303 | 2.014467  | -0.017931 |
| 6 | 6.425564 | 2.544227  | -1.186823 |
| 1 | 6.228651 | 1.950889  | -2.074647 |
| 6 | 7.085114 | 3.785146  | -1.243626 |
| 1 | 7.412975 | 4.181841  | -2.199686 |
| 6 | 7.298546 | 4.495229  | -0.046787 |
| 1 | 7.793283 | 5.463282  | -0.059199 |
| 6 | 6.858661 | 3.932478  | 1.166779  |
| 1 | 7.006221 | 4.445961  | 2.111984  |
| 6 | 6.210464 | 2.685471  | 1.139109  |
| 1 | 5.854243 | 2.199600  | 2.042387  |
| 8 | 5.143625 | -0.008907 | 1.609642  |

-----  
SCF Done: E(RB+HF-LYP) = -3176.87653000 A.U.  
-----  
-----

Os-PC

-----

| Atomic<br>Number | Coordinates (Angstroms) |           |           |
|------------------|-------------------------|-----------|-----------|
|                  | X                       | Y         | Z         |
| 6                | 0.872497                | 0.668431  | 0.013441  |
| 6                | 0.870283                | -0.742836 | -0.006220 |
| 8                | 3.277420                | -1.382739 | 0.003484  |
| 76               | 4.431304                | -0.043067 | 0.004828  |
| 8                | 3.272527                | 1.290307  | 0.003259  |
| 6                | 0.401953                | 1.413148  | -1.159949 |
| 6                | -0.329971               | 2.588909  | -0.692314 |
| 6                | -0.331080               | 2.568288  | 0.771504  |
| 6                | 0.400582                | 1.379903  | 1.206976  |
| 6                | -0.034328               | 0.664625  | 2.331406  |
| 6                | -0.036248               | -0.801830 | 2.310860  |

# Supplementary Material (ESI) for Dalton Transactions  
# This journal is (c) The Royal Society of Chemistry 2011

|   |           |           |           |
|---|-----------|-----------|-----------|
| 6 | 0.396187  | -1.485965 | 1.166446  |
| 6 | -0.338056 | -2.659776 | 0.697664  |
| 6 | -0.336849 | -2.639142 | -0.766159 |
| 6 | 0.398528  | -1.452705 | -1.200482 |
| 6 | -0.032528 | -0.736194 | -2.325670 |
| 6 | -0.030652 | 0.730262  | -2.304977 |
| 6 | -1.213493 | 1.193193  | -3.030424 |
| 6 | -1.915509 | 2.325628  | -2.583872 |
| 6 | -1.463610 | 3.038893  | -1.389496 |
| 6 | -2.647909 | 3.483255  | -0.651704 |
| 6 | -2.648993 | 3.463377  | 0.752603  |
| 6 | -1.465915 | 2.998242  | 1.479411  |
| 6 | -1.919590 | 2.251592  | 2.652585  |
| 6 | -1.218194 | 1.106944  | 3.067845  |
| 6 | -1.952439 | -0.082623 | 3.502673  |
| 6 | -1.221440 | -1.261467 | 3.034447  |
| 6 | -1.925781 | -2.392033 | 2.586800  |
| 6 | -1.473952 | -3.106553 | 1.393134  |
| 6 | -2.658227 | -3.547682 | 0.653438  |
| 6 | -2.657073 | -3.527811 | -0.750890 |
| 6 | -1.471682 | -3.065900 | -1.475905 |
| 6 | -1.921506 | -2.317987 | -2.649767 |
| 6 | -1.216408 | -1.175207 | -3.063930 |
| 6 | -1.946844 | 0.016349  | -3.499856 |
| 6 | -3.351539 | 0.018255  | -3.503201 |
| 6 | -4.082642 | 1.197151  | -3.035479 |
| 6 | -3.378966 | 2.326397  | -2.584816 |
| 6 | -3.831913 | 3.042494  | -1.390752 |
| 6 | -4.969765 | 2.600169  | -0.695719 |
| 6 | -4.970840 | 2.579467  | 0.767864  |
| 6 | -3.834066 | 3.001841  | 1.477010  |
| 6 | -3.383158 | 2.252407  | 2.651269  |
| 6 | -4.087617 | 1.110832  | 3.068417  |
| 6 | -3.357140 | -0.080782 | 3.503843  |
| 6 | -4.090611 | -1.257740 | 3.034990  |
| 6 | -3.389220 | -2.388850 | 2.585428  |
| 6 | -3.842193 | -3.103749 | 1.390635  |
| 6 | -4.977754 | -2.658389 | 0.693820  |
| 6 | -4.976492 | -2.637696 | -0.769761 |
| 6 | -3.839764 | -3.063098 | -1.477133 |

# Supplementary Material (ESI) for Dalton Transactions  
# This journal is (c) The Royal Society of Chemistry 2011

|   |           |           |           |
|---|-----------|-----------|-----------|
| 6 | -3.385051 | -2.314863 | -2.650711 |
| 6 | -4.085826 | -1.171427 | -3.068958 |
| 6 | -5.269592 | -0.727968 | -2.331536 |
| 6 | -5.267722 | 0.736095  | -2.310875 |
| 6 | -5.702346 | 1.422986  | -1.165280 |
| 6 | -6.156432 | 0.674767  | 0.008057  |
| 6 | -5.704215 | 1.389604  | 1.202790  |
| 6 | -5.271410 | 0.670500  | 2.329170  |
| 6 | -5.273341 | -0.793566 | 2.308526  |
| 6 | -5.707974 | -1.479308 | 1.162252  |
| 6 | -6.158236 | -0.729895 | -0.011800 |
| 6 | -5.706053 | -1.445916 | -1.205839 |
| 7 | 5.989051  | -1.964649 | 0.010876  |
| 6 | 6.440426  | -2.471729 | 1.183298  |
| 1 | 6.216979  | -1.880700 | 2.065505  |
| 6 | 7.142717  | -3.686736 | 1.242618  |
| 1 | 7.481656  | -4.066844 | 2.201097  |
| 6 | 7.380067  | -4.393518 | 0.048628  |
| 1 | 7.905387  | -5.345087 | 0.065526  |
| 6 | 6.922954  | -3.850401 | -1.167561 |
| 1 | 7.087308  | -4.362011 | -2.110868 |
| 6 | 6.232238  | -2.627756 | -1.147031 |
| 1 | 5.859421  | -2.155087 | -2.050038 |
| 8 | 5.099314  | -0.042578 | -1.637440 |
| 7 | 5.970939  | 1.900586  | -0.015513 |
| 6 | 6.407348  | 2.417698  | -1.189807 |
| 1 | 6.172581  | 1.834577  | -2.074369 |
| 6 | 7.111745  | 3.632381  | -1.250261 |
| 1 | 7.440550  | 4.018749  | -2.209935 |
| 6 | 7.367591  | 4.330323  | -0.054874 |
| 1 | 7.899249  | 5.278689  | -0.071587 |
| 6 | 6.920081  | 3.782038  | 1.162410  |
| 1 | 7.096771  | 4.288482  | 2.106461  |
| 6 | 6.225491  | 2.560498  | 1.142108  |
| 1 | 5.859485  | 2.086351  | 2.047142  |
| 8 | 5.096079  | -0.029092 | 1.648929  |

-----  
SCF Done: E(RB+HF-LYP) = -3174.15350799 A.U.  
-----  
-----



[ 6, 5 ]-Fe-TS

| Atomic<br>Number | Coordinates (Angstroms) |           |           |
|------------------|-------------------------|-----------|-----------|
|                  | X                       | Y         | Z         |
| 6                | -1.053397               | -0.734794 | -0.076896 |
| 6                | -1.053648               | 0.737791  | -0.095459 |
| 8                | -3.283355               | 1.263463  | -0.074970 |
| 26               | -4.306243               | -0.004640 | -0.046880 |
| 8                | -3.283446               | -1.273352 | -0.077324 |
| 6                | -0.571317               | -1.445271 | -1.201784 |
| 6                | 0.259172                | -2.631226 | -1.014218 |
| 6                | 0.603853                | -3.048700 | 0.278720  |
| 6                | 0.128976                | -2.298628 | 1.448337  |
| 6                | -0.663072               | -1.162325 | 1.270050  |
| 6                | -0.443323               | 0.028479  | 2.080601  |
| 6                | -0.661801               | 1.198662  | 1.240193  |
| 6                | 0.131159                | 2.338194  | 1.389748  |
| 6                | 0.606987                | 3.057642  | 0.201465  |
| 6                | 0.261255                | 2.608615  | -1.080575 |
| 6                | -0.571046               | 1.419305  | -1.238206 |
| 6                | -0.107001               | 0.679239  | -2.388272 |
| 6                | -0.107558               | -0.735187 | -2.370435 |
| 6                | 1.026246                | -1.475650 | -2.930827 |
| 6                | 1.251460                | -2.649525 | -2.086429 |
| 6                | 2.558719                | -3.078057 | -1.815059 |
| 6                | 2.921003                | -3.511078 | -0.466301 |
| 6                | 1.964434                | -3.497972 | 0.560501  |
| 6                | 2.329139                | -3.028860 | 1.898479  |
| 6                | 1.192306                | -2.288960 | 2.447964  |
| 6                | 1.408449                | -1.143172 | 3.233751  |
| 6                | 0.569833                | 0.040115  | 3.052626  |
| 6                | 1.409703                | 1.226667  | 3.203810  |
| 6                | 1.194650                | 2.352423  | 2.389342  |
| 6                | 2.332215                | 3.076731  | 1.821196  |
| 6                | 1.968065                | 3.512141  | 0.471857  |
| 6                | 2.924637                | 3.499196  | -0.554886 |

# Supplementary Material (ESI) for Dalton Transactions  
# This journal is (c) The Royal Society of Chemistry 2011

|   |           |           |           |
|---|-----------|-----------|-----------|
| 6 | 2.561710  | 3.032530  | -1.892306 |
| 6 | 1.253875  | 2.598646  | -2.152779 |
| 6 | 1.027567  | 1.404101  | -2.967187 |
| 6 | 2.115090  | 0.691744  | -3.489020 |
| 6 | 2.114383  | -0.777928 | -3.470378 |
| 6 | 3.476796  | -1.224703 | -3.189925 |
| 6 | 3.693655  | -2.350402 | -2.378745 |
| 6 | 4.760982  | -2.336306 | -1.379208 |
| 6 | 4.283470  | -3.052639 | -0.196733 |
| 6 | 4.633156  | -2.604052 | 1.084388  |
| 6 | 3.635559  | -2.590866 | 2.154841  |
| 6 | 3.861103  | -1.396439 | 2.968921  |
| 6 | 2.771720  | -0.687647 | 3.496729  |
| 6 | 2.772472  | 0.776400  | 3.478118  |
| 6 | 3.862578  | 1.470481  | 2.932730  |
| 6 | 3.638177  | 2.644137  | 2.088681  |
| 6 | 4.635676  | 2.629335  | 1.018280  |
| 6 | 4.286640  | 3.046136  | -0.273746 |
| 6 | 4.763121  | 2.299407  | -1.437638 |
| 6 | 3.695819  | 2.289456  | -2.437190 |
| 6 | 3.477918  | 1.143962  | -3.219866 |
| 6 | 4.318426  | -0.038668 | -3.033714 |
| 6 | 5.341552  | -0.027098 | -2.075450 |
| 6 | 5.567260  | -1.199357 | -1.231024 |
| 6 | 5.932857  | -0.730522 | 0.105093  |
| 6 | 5.474098  | -1.417539 | 1.238675  |
| 6 | 4.996610  | -0.672549 | 2.401411  |
| 6 | 4.997333  | 0.731325  | 2.383663  |
| 6 | 5.475501  | 1.446316  | 1.202501  |
| 6 | 5.933511  | 0.730441  | 0.086642  |
| 6 | 5.568325  | 1.165817  | -1.260836 |
| 7 | -5.889750 | 2.228887  | 0.008149  |
| 6 | -6.366595 | 2.696518  | 1.182869  |
| 1 | -6.098834 | 2.121998  | 2.067013  |
| 6 | -7.165885 | 3.849765  | 1.262174  |
| 1 | -7.528594 | 4.193792  | 2.225250  |
| 6 | -7.475838 | 4.535857  | 0.073240  |
| 1 | -8.088259 | 5.432640  | 0.098811  |
| 6 | -6.982038 | 4.044164  | -1.149486 |
| 1 | -7.199211 | 4.541810  | -2.088919 |

# Supplementary Material (ESI) for Dalton Transactions  
# This journal is (c) The Royal Society of Chemistry 2011

|   |           |           |           |
|---|-----------|-----------|-----------|
| 6 | -6.189908 | 2.883676  | -1.135624 |
| 1 | -5.787022 | 2.455621  | -2.050775 |
| 8 | -5.086109 | 0.001680  | -1.444653 |
| 7 | -5.892451 | -2.220692 | -0.003629 |
| 6 | -6.288207 | -2.796491 | -1.160367 |
| 1 | -5.968510 | -2.300188 | -2.074103 |
| 6 | -7.072584 | -3.962129 | -1.187139 |
| 1 | -7.369140 | -4.395149 | -2.136831 |
| 6 | -7.454387 | -4.543623 | 0.036205  |
| 1 | -8.057050 | -5.447184 | 0.051712  |
| 6 | -7.045131 | -3.938848 | 1.239239  |
| 1 | -7.319851 | -4.353389 | 2.203577  |
| 6 | -6.262204 | -2.774042 | 1.172402  |
| 1 | -5.921805 | -2.259587 | 2.068307  |
| 8 | -5.005796 | -0.006451 | 1.395135  |

-----  
SCF Done: E(RB+HF-LYP) = -3206.30339151 A.U.  
-----  
-----

[6,6]-Fe-TS

-----

| Atomic<br>Number | Coordinates (Angstroms) |           |           |
|------------------|-------------------------|-----------|-----------|
|                  | X                       | Y         | Z         |
| 6                | 1.018032                | 0.688001  | 0.010630  |
| 6                | 1.013564                | -0.712064 | -0.006348 |
| 8                | 3.352134                | -1.274749 | 0.003180  |
| 26               | 4.339307                | -0.001673 | 0.000712  |
| 8                | 3.352543                | 1.272456  | -0.001110 |
| 6                | 0.578221                | 1.433931  | -1.164345 |
| 6                | -0.140374               | 2.613191  | -0.698771 |
| 6                | -0.141333               | 2.595623  | 0.764627  |
| 6                | 0.576604                | 1.405373  | 1.202530  |
| 6                | 0.152434                | 0.695900  | 2.322893  |
| 6                | 0.147856                | -0.769727 | 2.305282  |
| 6                | 0.567402                | -1.454697 | 1.168126  |
| 6                | -0.157868               | -2.629402 | 0.701821  |

# Supplementary Material (ESI) for Dalton Transactions  
# This journal is (c) The Royal Society of Chemistry 2011

|   |           |           |           |
|---|-----------|-----------|-----------|
| 6 | -0.156983 | -2.611771 | -0.761577 |
| 6 | 0.569037  | -1.426243 | -1.198664 |
| 6 | 0.150711  | -0.713825 | -2.319413 |
| 6 | 0.155559  | 0.751758  | -2.301930 |
| 6 | -1.020093 | 1.215705  | -3.029565 |
| 6 | -1.714842 | 2.343332  | -2.584319 |
| 6 | -1.263562 | 3.060186  | -1.393564 |
| 6 | -2.444653 | 3.505796  | -0.655501 |
| 6 | -2.445549 | 3.489005  | 0.740311  |
| 6 | -1.265436 | 3.025617  | 1.468874  |
| 6 | -1.718150 | 2.280265  | 2.641491  |
| 6 | -1.023946 | 1.142162  | 3.060188  |
| 6 | -1.758550 | -0.045128 | 3.496313  |
| 6 | -1.031467 | -1.226211 | 3.031650  |
| 6 | -1.732781 | -2.349445 | 2.585561  |
| 6 | -1.284676 | -3.069146 | 1.395378  |
| 6 | -2.467649 | -3.507267 | 0.655900  |
| 6 | -2.466761 | -3.490426 | -0.739899 |
| 6 | -1.282912 | -3.034532 | -1.467079 |
| 6 | -1.729451 | -2.286295 | -2.640174 |
| 6 | -1.027559 | -1.152624 | -3.058082 |
| 6 | -1.754116 | 0.039295  | -3.495066 |
| 6 | -3.148876 | 0.043679  | -3.494446 |
| 6 | -3.875858 | 1.223291  | -3.028308 |
| 6 | -3.175305 | 2.345821  | -2.583527 |
| 6 | -3.626237 | 3.064167  | -1.392378 |
| 6 | -4.756445 | 2.627136  | -0.700249 |
| 6 | -4.757328 | 2.609504  | 0.760929  |
| 6 | -3.627996 | 3.029672  | 1.464869  |
| 6 | -3.178643 | 2.282829  | 2.638993  |
| 6 | -3.879754 | 1.149840  | 3.055529  |
| 6 | -3.153303 | -0.040681 | 3.494070  |
| 6 | -3.887127 | -1.215707 | 3.027014  |
| 6 | -3.193204 | -2.342682 | 2.583087  |
| 6 | -3.647259 | -3.058167 | 1.391382  |
| 6 | -4.773832 | -2.613943 | 0.697919  |
| 6 | -4.772858 | -2.596305 | -0.763248 |
| 6 | -3.645376 | -3.023623 | -1.465833 |
| 6 | -3.189915 | -2.279645 | -2.639441 |
| 6 | -3.883332 | -1.142242 | -3.056784 |

# Supplementary Material (ESI) for Dalton Transactions  
# This journal is (c) The Royal Society of Chemistry 2011

|   |           |           |           |
|---|-----------|-----------|-----------|
| 6 | -5.063222 | -0.695620 | -2.320979 |
| 6 | -5.058628 | 0.766455  | -2.303351 |
| 6 | -5.489170 | 1.451885  | -1.166411 |
| 6 | -5.943187 | 0.708175  | 0.006563  |
| 6 | -5.490642 | 1.423412  | 1.197694  |
| 6 | -5.061527 | 0.710665  | 2.318299  |
| 6 | -5.066159 | -0.751410 | 2.300695  |
| 6 | -5.499682 | -1.434104 | 1.163244  |
| 6 | -5.947590 | -0.687551 | -0.010275 |
| 6 | -5.498172 | -1.405627 | -1.200891 |
| 7 | 5.915060  | -2.332268 | 0.007123  |
| 6 | 6.410274  | -2.823379 | 1.165201  |
| 1 | 6.181734  | -2.250500 | 2.060283  |
| 6 | 7.177810  | -3.993083 | 1.223214  |
| 1 | 7.554128  | -4.348203 | 2.175341  |
| 6 | 7.442759  | -4.681974 | 0.032716  |
| 1 | 8.033919  | -5.591547 | 0.042446  |
| 6 | 6.933975  | -4.177535 | -1.171062 |
| 1 | 7.117173  | -4.678635 | -2.114218 |
| 6 | 6.175484  | -3.001440 | -1.138577 |
| 1 | 5.764019  | -2.569775 | -2.047001 |
| 8 | 5.134221  | -0.005907 | -1.387759 |
| 7 | 5.910704  | 2.334505  | -0.008479 |
| 6 | 6.381352  | 2.842091  | -1.169876 |
| 1 | 6.143540  | 2.275629  | -2.066593 |
| 6 | 7.135708  | 4.020500  | -1.229459 |
| 1 | 7.492391  | 4.388560  | -2.184274 |
| 6 | 7.413328  | 4.701092  | -0.037053 |
| 1 | 7.994880  | 5.616999  | -0.047940 |
| 6 | 6.929652  | 4.180187  | 1.170188  |
| 1 | 7.123182  | 4.674587  | 2.114895  |
| 6 | 6.182989  | 2.996255  | 1.139115  |
| 1 | 5.790566  | 2.551643  | 2.049951  |
| 8 | 5.135836  | 0.001737  | 1.388472  |

-----  
SCF Done: E(RB+HF-LYP) = -3206.30575503 A.U.  
-----  
-----

[ 6 , 5 ] -Ru-TS

---

| Atomic<br>Number | Coordinates (Angstroms) |           |           |
|------------------|-------------------------|-----------|-----------|
|                  | X                       | Y         | Z         |
| 6                | -1.095729               | -0.739603 | -0.084234 |
| 6                | -1.095228               | 0.743091  | -0.102603 |
| 8                | -3.260958               | 1.331774  | -0.095235 |
| 44               | -4.441409               | 0.001451  | -0.051876 |
| 8                | -3.261533               | -1.329287 | -0.100622 |
| 6                | -0.577877               | -1.444935 | -1.204297 |
| 6                | 0.262708                | -2.627083 | -1.015553 |
| 6                | 0.608611                | -3.048224 | 0.275788  |
| 6                | 0.129382                | -2.294363 | 1.441071  |
| 6                | -0.675398               | -1.163371 | 1.263627  |
| 6                | -0.446724               | 0.028539  | 2.071528  |
| 6                | -0.673443               | 1.199937  | 1.233861  |
| 6                | 0.132050                | 2.334217  | 1.382847  |
| 6                | 0.612228                | 3.057517  | 0.198766  |
| 6                | 0.265251                | 2.604833  | -1.081541 |
| 6                | -0.577393               | 1.419490  | -1.240558 |
| 6                | -0.103556               | 0.679455  | -2.386160 |
| 6                | -0.104159               | -0.734838 | -2.368406 |
| 6                | 1.036122                | -1.472689 | -2.925893 |
| 6                | 1.261201                | -2.647102 | -2.084475 |
| 6                | 2.570654                | -3.078686 | -1.815233 |
| 6                | 2.933354                | -3.513693 | -0.466590 |
| 6                | 1.971831                | -3.497060 | 0.557922  |
| 6                | 2.335545                | -3.026302 | 1.895113  |
| 6                | 1.196264                | -2.284579 | 2.439539  |
| 6                | 1.412992                | -1.140928 | 3.227414  |
| 6                | 0.572600                | 0.040175  | 3.041880  |
| 6                | 1.414392                | 1.224592  | 3.197628  |
| 6                | 1.199000                | 2.348319  | 2.381256  |
| 6                | 2.339104                | 3.074483  | 1.818081  |
| 6                | 1.975971                | 3.511533  | 0.469462  |
| 6                | 2.937472                | 3.502061  | -0.555127 |
| 6                | 2.574038                | 3.033366  | -1.892328 |
| 6                | 1.263981                | 2.596572  | -2.150512 |

# Supplementary Material (ESI) for Dalton Transactions  
# This journal is (c) The Royal Society of Chemistry 2011

|   |           |           |           |
|---|-----------|-----------|-----------|
| 6 | 1.037619  | 1.401632  | -2.961981 |
| 6 | 2.127688  | 0.691460  | -3.484715 |
| 6 | 2.126919  | -0.777255 | -3.466161 |
| 6 | 3.490894  | -1.225076 | -3.188554 |
| 6 | 3.708596  | -2.353115 | -2.378743 |
| 6 | 4.777685  | -2.339602 | -1.378407 |
| 6 | 4.297790  | -3.056634 | -0.195474 |
| 6 | 4.646823  | -2.606989 | 1.087746  |
| 6 | 3.644964  | -2.591957 | 2.155711  |
| 6 | 3.870647  | -1.397125 | 2.971249  |
| 6 | 2.778122  | -0.687511 | 3.496074  |
| 6 | 2.778980  | 0.776445  | 3.477492  |
| 6 | 3.872340  | 1.471322  | 2.935107  |
| 6 | 3.648004  | 2.645434  | 2.089624  |
| 6 | 4.649741  | 2.632403  | 1.021618  |
| 6 | 4.301405  | 3.050265  | -0.272534 |
| 6 | 4.780101  | 2.302708  | -1.436862 |
| 6 | 3.711023  | 2.292255  | -2.437150 |
| 6 | 3.492129  | 1.144516  | -3.218416 |
| 6 | 4.334092  | -0.038626 | -3.032875 |
| 6 | 5.359848  | -0.027117 | -2.074265 |
| 6 | 5.585551  | -1.200968 | -1.229270 |
| 6 | 5.950647  | -0.731519 | 0.108683  |
| 6 | 5.489450  | -1.419601 | 1.243270  |
| 6 | 5.009722  | -0.673394 | 2.406474  |
| 6 | 5.010553  | 0.732261  | 2.388717  |
| 6 | 5.491069  | 1.448411  | 1.207062  |
| 6 | 5.951393  | 0.731371  | 0.090218  |
| 6 | 5.586753  | 1.167363  | -1.259100 |
| 7 | -5.998316 | 2.049619  | 0.015389  |
| 6 | -6.436877 | 2.555973  | 1.193407  |
| 1 | -6.202238 | 1.967415  | 2.075496  |
| 6 | -7.149707 | 3.767258  | 1.267192  |
| 1 | -7.486550 | 4.141955  | 2.229361  |
| 6 | -7.409910 | 4.474792  | 0.078028  |
| 1 | -7.950149 | 5.418676  | 0.102980  |
| 6 | -6.957802 | 3.940706  | -1.144287 |
| 1 | -7.141069 | 4.453273  | -2.083954 |
| 6 | -6.255686 | 2.721768  | -1.133259 |
| 1 | -5.889875 | 2.258892  | -2.045226 |

# Supplementary Material (ESI) for Dalton Transactions  
# This journal is (c) The Royal Society of Chemistry 2011

|   |           |           |           |
|---|-----------|-----------|-----------|
| 8 | -5.165444 | 0.008607  | -1.650606 |
| 7 | -5.997682 | -2.047774 | -0.001338 |
| 6 | -6.357868 | -2.649070 | -1.161285 |
| 1 | -6.074994 | -2.127738 | -2.071228 |
| 6 | -7.056840 | -3.869958 | -1.184255 |
| 1 | -7.326115 | -4.323745 | -2.133427 |
| 6 | -7.392253 | -4.483078 | 0.038377  |
| 1 | -7.925147 | -5.431309 | 0.053662  |
| 6 | -7.025119 | -3.848811 | 1.240803  |
| 1 | -7.270078 | -4.285755 | 2.204448  |
| 6 | -6.326224 | -2.629181 | 1.178080  |
| 1 | -6.016442 | -2.093294 | 2.070556  |
| 8 | -5.040678 | -0.005833 | 1.599608  |

-----  
SCF Done: E(RB+HF-LYP) = -3176.87242291 A.U.  
-----  
-----

[6,6]-Ru-TS

-----

| Atomic<br>Number | Coordinates (Angstroms) |           |           |
|------------------|-------------------------|-----------|-----------|
|                  | X                       | Y         | Z         |
| 6                | 1.102457                | 0.706718  | 0.010868  |
| 6                | 1.099294                | -0.724832 | -0.006693 |
| 8                | 3.347230                | -1.324923 | -0.006918 |
| 44               | 4.526784                | 0.001694  | -0.000299 |
| 8                | 3.343941                | 1.325774  | 0.008693  |
| 6                | 0.597677                | 1.441655  | -1.164379 |
| 6                | -0.134020               | 2.615747  | -0.698027 |
| 6                | -0.134848               | 2.597498  | 0.766022  |
| 6                | 0.596832                | 1.412280  | 1.203830  |
| 6                | 0.160067                | 0.699330  | 2.326303  |
| 6                | 0.156662                | -0.771490 | 2.307956  |
| 6                | 0.590207                | -1.457941 | 1.167955  |
| 6                | -0.146773               | -2.628628 | 0.700814  |
| 6                | -0.145880               | -2.610376 | -0.763192 |
| 6                | 0.592021                | -1.428543 | -1.200123 |



# Supplementary Material (ESI) for Dalton Transactions  
# This journal is (c) The Royal Society of Chemistry 2011

|   |           |           |           |
|---|-----------|-----------|-----------|
| 6 | 0.159443  | -0.713595 | -2.323052 |
| 6 | 0.162835  | 0.757239  | -2.304964 |
| 6 | -1.017705 | 1.218399  | -3.032421 |
| 6 | -1.719002 | 2.353341  | -2.588693 |
| 6 | -1.266624 | 3.067876  | -1.396107 |
| 6 | -2.450117 | 3.514938  | -0.658285 |
| 6 | -2.450935 | 3.497377  | 0.746070  |
| 6 | -1.268376 | 3.031921  | 1.473890  |
| 6 | -1.722087 | 2.287919  | 2.647851  |
| 6 | -1.021233 | 1.142224  | 3.063733  |
| 6 | -1.756292 | -0.046460 | 3.501263  |
| 6 | -1.026823 | -1.227240 | 3.034091  |
| 6 | -1.732911 | -2.358867 | 2.589558  |
| 6 | -1.282394 | -3.075444 | 1.397529  |
| 6 | -2.467171 | -3.517079 | 0.658416  |
| 6 | -2.466306 | -3.499537 | -0.745899 |
| 6 | -1.280703 | -3.039517 | -1.472303 |
| 6 | -1.729689 | -2.293473 | -2.646747 |
| 6 | -1.023018 | -1.151079 | -3.061854 |
| 6 | -1.752069 | 0.040963  | -3.500339 |
| 6 | -3.156293 | 0.044271  | -3.504070 |
| 6 | -3.886329 | 1.225010  | -3.037825 |
| 6 | -3.182116 | 2.355186  | -2.589712 |
| 6 | -3.634313 | 3.073726  | -1.396600 |
| 6 | -4.771836 | 2.632863  | -0.700396 |
| 6 | -4.772640 | 2.614575  | 0.763293  |
| 6 | -3.635923 | 3.037808  | 1.471716  |
| 6 | -3.185292 | 2.289815  | 2.647221  |
| 6 | -3.890101 | 1.148759  | 3.065876  |
| 6 | -3.160521 | -0.043222 | 3.503424  |
| 6 | -3.895494 | -1.220544 | 3.036285  |
| 6 | -3.196044 | -2.353999 | 2.588991  |
| 6 | -3.650209 | -3.070415 | 1.395352  |
| 6 | -4.784886 | -2.624211 | 0.697878  |
| 6 | -4.783924 | -2.605931 | -0.765797 |
| 6 | -3.648361 | -3.034505 | -1.472880 |
| 6 | -3.192905 | -2.288637 | -2.647881 |
| 6 | -3.891890 | -1.144300 | -3.067330 |
| 6 | -5.074231 | -0.698301 | -2.330530 |
| 6 | -5.070847 | 0.766222  | -2.312273 |

# Supplementary Material (ESI) for Dalton Transactions  
# This journal is (c) The Royal Society of Chemistry 2011

|   |           |           |           |
|---|-----------|-----------|-----------|
| 6 | -5.504756 | 1.455313  | -1.167707 |
| 6 | -5.958920 | 0.709359  | 0.006833  |
| 6 | -5.506163 | 1.425826  | 1.200168  |
| 6 | -5.073630 | 0.708279  | 2.327674  |
| 6 | -5.077074 | -0.756246 | 2.309438  |
| 6 | -5.512885 | -1.443291 | 1.164371  |
| 6 | -5.962205 | -0.695229 | -0.010701 |
| 6 | -5.511425 | -1.413799 | -1.203531 |
| 7 | 6.003062  | -2.280493 | 0.003552  |
| 6 | 6.458745  | -2.800741 | 1.169170  |
| 1 | 6.272158  | -2.202787 | 2.057670  |
| 6 | 7.134801  | -4.035584 | 1.230349  |
| 1 | 7.489727  | -4.414863 | 2.184301  |
| 6 | 7.340726  | -4.755659 | 0.037226  |
| 1 | 7.871257  | -5.706198 | 0.048225  |
| 6 | 6.849558  | -4.223506 | -1.170949 |
| 1 | 6.979505  | -4.752335 | -2.111402 |
| 6 | 6.184410  | -2.981703 | -1.143737 |
| 1 | 5.788130  | -2.527079 | -2.047794 |
| 8 | 5.298355  | 0.004105  | -1.565725 |
| 7 | 6.000704  | 2.290000  | -0.006248 |
| 6 | 6.430980  | 2.825157  | -1.174896 |
| 1 | 6.228692  | 2.236929  | -2.066331 |
| 6 | 7.101308  | 4.062953  | -1.235768 |
| 1 | 7.435387  | 4.454469  | -2.192331 |
| 6 | 7.328931  | 4.770036  | -0.038988 |
| 1 | 7.855857  | 5.722404  | -0.049963 |
| 6 | 6.864236  | 4.222461  | 1.172744  |
| 1 | 7.011477  | 4.740837  | 2.116320  |
| 6 | 6.202974  | 2.978768  | 1.144874  |
| 1 | 5.826554  | 2.512197  | 2.051365  |
| 8 | 5.301958  | 0.003511  | 1.563376  |

-----  
SCF Done: E(RB+HF-LYP) = -3176.87520407 A.U.  
-----  
-----

[6,5]-Os-TS

---

| Atomic<br>Number | Coordinates (Angstroms) |           |           |
|------------------|-------------------------|-----------|-----------|
|                  | X                       | Y         | Z         |
| 6                | -1.188128               | -0.754876 | -0.080026 |
| 6                | -1.191090               | 0.744118  | -0.097917 |
| 8                | -3.152119               | 1.313895  | -0.082043 |
| 76               | -4.388157               | -0.001022 | -0.044083 |
| 8                | -3.160229               | -1.323367 | -0.079468 |
| 6                | -0.620809               | -1.450107 | -1.201276 |
| 6                | 0.230767                | -2.627673 | -1.010907 |
| 6                | 0.579718                | -3.051430 | 0.276471  |
| 6                | 0.099399                | -2.293145 | 1.441124  |
| 6                | -0.714527               | -1.169602 | 1.266186  |
| 6                | -0.478559               | 0.021957  | 2.068844  |
| 6                | -0.716323               | 1.192620  | 1.237256  |
| 6                | 0.093783                | 2.322413  | 1.384182  |
| 6                | 0.572110                | 3.052691  | 0.200829  |
| 6                | 0.223724                | 2.596640  | -1.075589 |
| 6                | -0.625536               | 1.412867  | -1.236918 |
| 6                | -0.148574               | 0.677581  | -2.372426 |
| 6                | -0.146703               | -0.742254 | -2.355206 |
| 6                | 1.000376                | -1.474490 | -2.916757 |
| 6                | 1.229670                | -2.648527 | -2.079552 |
| 6                | 2.541339                | -3.079944 | -1.814414 |
| 6                | 2.906959                | -3.515120 | -0.467274 |
| 6                | 1.944546                | -3.497142 | 0.557035  |
| 6                | 2.308873                | -3.024577 | 1.892984  |
| 6                | 1.168940                | -2.282908 | 2.436426  |
| 6                | 1.385478                | -1.142418 | 3.227383  |
| 6                | 0.543223                | 0.035344  | 3.040618  |
| 6                | 1.382482                | 1.219515  | 3.198166  |
| 6                | 1.163231                | 2.339655  | 2.379336  |
| 6                | 2.301219                | 3.070393  | 1.817417  |
| 6                | 1.935745                | 3.508551  | 0.470171  |
| 6                | 2.898167                | 3.504428  | -0.554326 |
| 6                | 2.533480                | 3.034819  | -1.890200 |
| 6                | 1.222841                | 2.593491  | -2.144365 |
| 6                | 0.996673                | 1.398579  | -2.952111 |
| 6                | 2.086399                | 0.692046  | -3.477325 |

# Supplementary Material (ESI) for Dalton Transactions  
# This journal is (c) The Royal Society of Chemistry 2011

|   |           |           |           |
|---|-----------|-----------|-----------|
| 6 | 2.088330  | -0.778485 | -3.459134 |
| 6 | 3.454044  | -1.223433 | -3.186758 |
| 6 | 3.677087  | -2.352666 | -2.379455 |
| 6 | 4.748416  | -2.336712 | -1.380655 |
| 6 | 4.271238  | -3.055269 | -0.196818 |
| 6 | 4.620549  | -2.604773 | 1.086014  |
| 6 | 3.618616  | -2.590650 | 2.154371  |
| 6 | 3.843944  | -1.395874 | 2.970889  |
| 6 | 2.750659  | -0.688309 | 3.497263  |
| 6 | 2.748800  | 0.775706  | 3.479018  |
| 6 | 3.840312  | 1.472838  | 2.935379  |
| 6 | 3.612018  | 2.646464  | 2.089451  |
| 6 | 4.613836  | 2.636688  | 1.021008  |
| 6 | 4.263612  | 3.054710  | -0.272584 |
| 6 | 4.742323  | 2.307898  | -1.438145 |
| 6 | 3.670995  | 2.296420  | -2.436944 |
| 6 | 3.450956  | 1.147068  | -3.216143 |
| 6 | 4.295534  | -0.035040 | -3.032747 |
| 6 | 5.323900  | -0.021886 | -2.076665 |
| 6 | 5.553524  | -1.195951 | -1.232212 |
| 6 | 5.919492  | -0.725674 | 0.105822  |
| 6 | 5.461160  | -1.415130 | 1.241073  |
| 6 | 4.981434  | -0.670111 | 2.405087  |
| 6 | 4.979656  | 0.736192  | 2.387635  |
| 6 | 5.457485  | 1.453440  | 1.205483  |
| 6 | 5.917559  | 0.737214  | 0.087676  |
| 6 | 5.550377  | 1.173277  | -1.261545 |
| 7 | -5.896127 | 1.947277  | 0.008843  |
| 6 | -6.328882 | 2.455886  | 1.189811  |
| 1 | -6.068841 | 1.879211  | 2.071340  |
| 6 | -7.062582 | 3.652375  | 1.258782  |
| 1 | -7.396058 | 4.026808  | 2.221941  |
| 6 | -7.349100 | 4.345518  | 0.068013  |
| 1 | -7.916543 | 5.273057  | 0.090530  |
| 6 | -6.886623 | 3.818177  | -1.152636 |
| 1 | -7.079175 | 4.325549  | -2.093086 |
| 6 | -6.163499 | 2.613765  | -1.143099 |
| 1 | -5.787676 | 2.156125  | -2.052296 |
| 8 | -5.043827 | 0.005974  | -1.689122 |
| 7 | -5.914213 | -1.939017 | -0.003235 |

# Supplementary Material (ESI) for Dalton Transactions  
# This journal is (c) The Royal Society of Chemistry 2011

|   |           |           |           |
|---|-----------|-----------|-----------|
| 6 | -6.279871 | -2.535618 | -1.165960 |
| 1 | -5.983452 | -2.019084 | -2.073092 |
| 6 | -6.997011 | -3.743873 | -1.186779 |
| 1 | -7.270820 | -4.193526 | -2.136431 |
| 6 | -7.345091 | -4.351150 | 0.034502  |
| 1 | -7.901541 | -5.285617 | 0.049174  |
| 6 | -6.958299 | -3.729068 | 1.236418  |
| 1 | -7.202272 | -4.166653 | 2.199812  |
| 6 | -6.241160 | -2.522124 | 1.177744  |
| 1 | -5.912387 | -1.996215 | 2.068055  |
| 8 | -4.940363 | -0.005312 | 1.639767  |

-----  
SCF Done: E(RB+HF-LYP) = -3174.14424100 A.U.  
-----  
-----

[6,6]-Os-TS

-----

| Atomic<br>Number | Coordinates (Angstroms) |           |           |
|------------------|-------------------------|-----------|-----------|
|                  | X                       | Y         | Z         |
| 6                | 1.097347                | 0.702792  | 0.011007  |
| 6                | 1.094059                | -0.721503 | -0.006196 |
| 8                | 3.307174                | -1.328514 | 0.001212  |
| 76               | 4.496290                | -0.004309 | 0.000514  |
| 8                | 3.303940                | 1.316989  | 0.002392  |
| 6                | 0.601533                | 1.439385  | -1.163731 |
| 6                | -0.126426               | 2.615261  | -0.698120 |
| 6                | -0.127266               | 2.597198  | 0.766124  |
| 6                | 0.600779                | 1.410330  | 1.203487  |
| 6                | 0.168500                | 0.699292  | 2.328843  |
| 6                | 0.164644                | -0.770895 | 2.310721  |
| 6                | 0.593170                | -1.455860 | 1.168007  |
| 6                | -0.140863               | -2.627819 | 0.701458  |
| 6                | -0.139825               | -2.609729 | -0.762793 |
| 6                | 0.595292                | -1.426753 | -1.199255 |
| 6                | 0.167729                | -0.713396 | -2.325077 |
| 6                | 0.171460                | 0.756790  | -2.307075 |

# Supplementary Material (ESI) for Dalton Transactions  
# This journal is (c) The Royal Society of Chemistry 2011

|   |           |           |           |
|---|-----------|-----------|-----------|
| 6 | -1.008938 | 1.218791  | -3.033902 |
| 6 | -1.709571 | 2.354589  | -2.590001 |
| 6 | -1.257614 | 3.068984  | -1.397115 |
| 6 | -2.440684 | 3.516498  | -0.658724 |
| 6 | -2.441565 | 3.499052  | 0.746096  |
| 6 | -1.259495 | 3.033291  | 1.474711  |
| 6 | -1.712931 | 2.289670  | 2.649080  |
| 6 | -1.012787 | 1.143206  | 3.065427  |
| 6 | -1.748043 | -0.045359 | 3.502865  |
| 6 | -1.019145 | -1.226628 | 3.036054  |
| 6 | -1.725259 | -2.358651 | 2.591254  |
| 6 | -1.275503 | -3.075384 | 1.398966  |
| 6 | -2.460059 | -3.516624 | 0.659122  |
| 6 | -2.459091 | -3.499194 | -0.745665 |
| 6 | -1.273612 | -3.039697 | -1.472758 |
| 6 | -1.721703 | -2.293732 | -2.647645 |
| 6 | -1.014954 | -1.151033 | -3.063124 |
| 6 | -1.743410 | 0.041381  | -3.501574 |
| 6 | -3.147883 | 0.045147  | -3.504532 |
| 6 | -3.877245 | 1.226211  | -3.038426 |
| 6 | -3.172634 | 2.356334  | -2.590274 |
| 6 | -3.624709 | 3.075221  | -1.397088 |
| 6 | -4.762426 | 2.634583  | -0.700655 |
| 6 | -4.763305 | 2.616441  | 0.763045  |
| 6 | -3.626466 | 3.039564  | 1.471742  |
| 6 | -3.176104 | 2.291476  | 2.647527  |
| 6 | -3.881375 | 1.150562  | 3.066350  |
| 6 | -3.152527 | -0.041654 | 3.504083  |
| 6 | -3.887537 | -1.218825 | 3.037009  |
| 6 | -3.188345 | -2.352664 | 2.589743  |
| 6 | -3.642717 | -3.069115 | 1.395970  |
| 6 | -4.777225 | -2.622413 | 0.698142  |
| 6 | -4.776168 | -2.604279 | -0.765540 |
| 6 | -3.640679 | -3.033464 | -1.472766 |
| 6 | -3.184884 | -2.287806 | -2.647996 |
| 6 | -3.883569 | -1.143178 | -3.067704 |
| 6 | -5.065684 | -0.696604 | -2.330599 |
| 6 | -5.061837 | 0.767761  | -2.312492 |
| 6 | -5.495585 | 1.457181  | -1.167934 |
| 6 | -5.950058 | 0.711503  | 0.006704  |

# Supplementary Material (ESI) for Dalton Transactions  
# This journal is (c) The Royal Society of Chemistry 2011

|   |           |           |           |
|---|-----------|-----------|-----------|
| 6 | -5.497130 | 1.427936  | 1.200044  |
| 6 | -5.064897 | 0.710281  | 2.327720  |
| 6 | -5.068804 | -0.754088 | 2.309634  |
| 6 | -5.504760 | -1.441182 | 1.164525  |
| 6 | -5.953774 | -0.693098 | -0.010695 |
| 6 | -5.503159 | -1.411928 | -1.203477 |
| 7 | 5.974245  | -2.101899 | 0.012132  |
| 6 | 6.421834  | -2.625009 | 1.180977  |
| 1 | 6.205767  | -2.042162 | 2.070767  |
| 6 | 7.124630  | -3.843928 | 1.234743  |
| 1 | 7.475220  | -4.225959 | 2.189195  |
| 6 | 7.364113  | -4.545200 | 0.037465  |
| 1 | 7.915698  | -5.483552 | 0.045652  |
| 6 | 6.876864  | -4.009926 | -1.170970 |
| 1 | 7.031749  | -4.524948 | -2.114824 |
| 6 | 6.184317  | -2.784368 | -1.142648 |
| 1 | 5.791075  | -2.326522 | -2.045099 |
| 8 | 5.199078  | -0.011850 | -1.619949 |
| 7 | 5.967236  | 2.104392  | -0.014025 |
| 6 | 6.392252  | 2.640370  | -1.185493 |
| 1 | 6.167910  | 2.062685  | -2.076604 |
| 6 | 7.083223  | 3.866011  | -1.240682 |
| 1 | 7.415401  | 4.258715  | -2.197380 |
| 6 | 7.334980  | 4.560279  | -0.041816 |
| 1 | 7.877884  | 5.503650  | -0.051192 |
| 6 | 6.871354  | 4.011420  | 1.169775  |
| 1 | 7.036277  | 4.520542  | 2.115141  |
| 6 | 6.189189  | 2.780002  | 1.142515  |
| 1 | 5.813512  | 2.311703  | 2.047118  |
| 8 | 5.203259  | 0.008360  | 1.619434  |

-----  
SCF Done: E(RB+HF-LYP) = -3174.15083445 A.U.  
-----  
-----

[6,5]-Fe-Pro  
-----

Atomic

Coordinates (Angstroms)

Number X Y Z

---

|   |           |           |           |
|---|-----------|-----------|-----------|
| 6 | 1.780597  | 0.114380  | -0.125531 |
| 6 | 1.605797  | -1.385195 | -0.258583 |
| 6 | 1.044343  | 0.815741  | -1.285591 |
| 6 | 0.159110  | 1.842680  | -0.793230 |
| 6 | 0.062269  | 1.750559  | 0.642682  |
| 6 | 1.100005  | 0.759782  | 1.205699  |
| 6 | 0.401817  | -0.237524 | 2.106526  |
| 6 | 0.517124  | -1.619345 | 1.955184  |
| 6 | 1.121427  | -2.195616 | 0.768238  |
| 6 | 0.523765  | -3.421265 | 0.181130  |
| 6 | 0.646551  | -3.315285 | -1.264644 |
| 6 | 1.301935  | -2.038221 | -1.541349 |
| 6 | 0.899410  | -1.281846 | -2.640949 |
| 6 | 0.754577  | 0.187249  | -2.494847 |
| 6 | -0.400119 | 0.588619  | -3.281564 |
| 6 | -1.237143 | 1.627804  | -2.836751 |
| 6 | -0.953050 | 2.270022  | -1.565758 |
| 6 | -2.216044 | 2.561494  | -0.911409 |
| 6 | -2.314985 | 2.415476  | 0.484141  |
| 6 | -1.157264 | 2.010474  | 1.263965  |
| 6 | -1.646954 | 1.147582  | 2.366576  |
| 6 | -0.885124 | 0.048029  | 2.758603  |
| 6 | -1.546465 | -1.222720 | 3.048794  |
| 6 | -0.677638 | -2.274694 | 2.544163  |
| 6 | -1.225879 | -3.414892 | 1.958958  |
| 6 | -0.609717 | -4.002764 | 0.747110  |
| 6 | -1.683981 | -4.501201 | -0.103022 |
| 6 | -1.578204 | -4.389447 | -1.502487 |
| 6 | -0.388780 | -3.784115 | -2.094804 |
| 6 | -0.810084 | -2.990074 | -3.245734 |
| 6 | -0.180318 | -1.757994 | -3.504587 |
| 6 | -0.980320 | -0.602741 | -3.906633 |
| 6 | -2.373056 | -0.716302 | -4.039475 |
| 6 | -3.245654 | 0.357961  | -3.557379 |
| 6 | -2.687986 | 1.507623  | -2.973511 |
| 6 | -3.297396 | 2.089059  | -1.774548 |
| 6 | -4.439362 | 1.497549  | -1.209129 |
| 6 | -4.551624 | 1.362790  | 0.246034  |



# Supplementary Material (ESI) for Dalton Transactions  
# This journal is (c) The Royal Society of Chemistry 2011

|    |           |           |           |
|----|-----------|-----------|-----------|
| 6  | -3.513143 | 1.814235  | 1.075203  |
| 6  | -3.097792 | 1.025868  | 2.233900  |
| 6  | -3.740186 | -0.194153 | 2.517722  |
| 6  | -2.943510 | -1.346337 | 2.930191  |
| 6  | -3.518229 | -2.538346 | 2.313043  |
| 6  | -2.671775 | -3.558757 | 1.839404  |
| 6  | -2.956602 | -4.218835 | 0.563782  |
| 6  | -4.072654 | -3.828438 | -0.193036 |
| 6  | -3.959712 | -3.698424 | -1.647560 |
| 6  | -2.741665 | -3.975229 | -2.288452 |
| 6  | -2.266224 | -3.104416 | -3.367908 |
| 6  | -3.030081 | -1.994637 | -3.758896 |
| 6  | -4.303780 | -1.707135 | -3.092888 |
| 6  | -4.434219 | -0.256925 | -2.971011 |
| 6  | -5.020543 | 0.302938  | -1.817315 |
| 6  | -5.497111 | -0.568089 | -0.745515 |
| 6  | -5.212548 | 0.087961  | 0.533877  |
| 6  | -4.813405 | -0.673884 | 1.642090  |
| 6  | -4.677355 | -2.128367 | 1.518414  |
| 6  | -4.945920 | -2.757215 | 0.292258  |
| 6  | -5.367666 | -1.962598 | -0.863651 |
| 6  | -4.759888 | -2.542584 | -2.058945 |
| 26 | 3.726338  | 1.667353  | 1.114747  |
| 8  | 2.133354  | 1.447208  | 1.973662  |
| 8  | 3.205517  | 0.423593  | -0.123949 |
| 8  | 4.640331  | 0.692213  | 2.047781  |
| 8  | 3.345521  | 3.000297  | 0.250558  |
| 7  | 4.203234  | 3.142835  | 2.680385  |
| 6  | 3.990868  | 4.461581  | 2.466866  |
| 6  | 4.601050  | 2.708696  | 3.899209  |
| 6  | 4.185134  | 5.412381  | 3.481910  |
| 1  | 3.654258  | 4.727011  | 1.469974  |
| 6  | 4.809934  | 3.598771  | 4.964878  |
| 1  | 4.743809  | 1.637452  | 3.996291  |
| 6  | 4.601619  | 4.974713  | 4.753197  |
| 1  | 4.006848  | 6.463068  | 3.276170  |
| 1  | 5.121595  | 3.216283  | 5.931640  |
| 1  | 4.754471  | 5.686806  | 5.559809  |
| 7  | 5.675512  | 1.927943  | 0.036341  |
| 6  | 6.762632  | 1.211099  | 0.406472  |

# Supplementary Material (ESI) for Dalton Transactions  
# This journal is (c) The Royal Society of Chemistry 2011

|   |          |          |           |
|---|----------|----------|-----------|
| 6 | 5.755670 | 2.785173 | -1.008372 |
| 6 | 7.992927 | 1.339294 | -0.260323 |
| 1 | 6.617133 | 0.535877 | 1.243728  |
| 6 | 6.950737 | 2.966615 | -1.724702 |
| 1 | 4.841707 | 3.317665 | -1.250603 |
| 6 | 8.090726 | 2.234468 | -1.342614 |
| 1 | 8.844465 | 0.749193 | 0.063832  |
| 1 | 6.978606 | 3.661071 | -2.558937 |
| 1 | 9.030054 | 2.355777 | -1.876764 |

-----  
SCF Done: E(RB+HF-LYP) = -3206.41605840 A.U.  
-----  
-----

[6,6]-Fe-Pro

-----

| Atomic<br>Number | Coordinates (Angstroms) |           |           |
|------------------|-------------------------|-----------|-----------|
|                  | X                       | Y         | Z         |
| 6                | 1.549765                | 0.883389  | 0.079467  |
| 6                | 1.594464                | -0.711200 | -0.037678 |
| 6                | 0.781628                | 1.591354  | -1.057622 |
| 6                | 0.005057                | 2.686920  | -0.523117 |
| 6                | 0.000795                | 2.577480  | 0.938021  |
| 6                | 0.776615                | 1.414536  | 1.309038  |
| 6                | 0.355821                | 0.623175  | 2.365250  |
| 6                | 0.397711                | -0.861484 | 2.254754  |
| 6                | 0.854806                | -1.460558 | 1.093187  |
| 6                | 0.147490                | -2.598312 | 0.550055  |
| 6                | 0.153640                | -2.489859 | -0.911227 |
| 6                | 0.867091                | -1.285480 | -1.273948 |
| 6                | 0.415432                | -0.517701 | -2.334799 |
| 6                | 0.372786                | 0.966905  | -2.224049 |
| 6                | -0.819051               | 1.426195  | -2.923894 |
| 6                | -1.559739               | 2.515986  | -2.427614 |
| 6                | -1.137056               | 3.161902  | -1.195127 |
| 6                | -2.335299               | 3.530231  | -0.437541 |
| 6                | -2.340127               | 3.424931  | 0.961440  |

# Supplementary Material (ESI) for Dalton Transactions  
# This journal is (c) The Royal Society of Chemistry 2011

|   |           |           |           |
|---|-----------|-----------|-----------|
| 6 | -1.147291 | 2.947049  | 1.664439  |
| 6 | -1.578888 | 2.125541  | 2.784314  |
| 6 | -0.840979 | 0.973462  | 3.117302  |
| 6 | -1.539557 | -0.261053 | 3.473612  |
| 6 | -0.774410 | -1.387329 | 2.940573  |
| 6 | -1.446828 | -2.516919 | 2.435935  |
| 6 | -0.973840 | -3.137614 | 1.208557  |
| 6 | -2.140741 | -3.572231 | 0.437211  |
| 6 | -2.135381 | -3.467161 | -0.961834 |
| 6 | -0.963293 | -2.922807 | -1.651051 |
| 6 | -1.426863 | -2.126240 | -2.776288 |
| 6 | -0.751149 | -0.934351 | -3.100648 |
| 6 | -1.513578 | 0.258999  | -3.465165 |
| 6 | -2.916574 | 0.220891  | -3.490169 |
| 6 | -3.686534 | 1.348870  | -2.960536 |
| 6 | -3.020887 | 2.472739  | -2.440593 |
| 6 | -3.502606 | 3.102089  | -1.208817 |
| 6 | -4.628829 | 2.581658  | -0.548176 |
| 6 | -4.633761 | 2.472245  | 0.911941  |
| 6 | -3.512484 | 2.886758  | 1.651391  |
| 6 | -3.040421 | 2.081357  | 2.780037  |
| 6 | -3.709693 | 0.892683  | 3.120491  |
| 6 | -2.942692 | -0.301793 | 3.481347  |
| 6 | -3.642051 | -1.471034 | 2.943695  |
| 6 | -2.908104 | -2.555475 | 2.431922  |
| 6 | -3.339058 | -3.210372 | 1.194831  |
| 6 | -4.484913 | -2.754400 | 0.520676  |
| 6 | -4.479181 | -2.644749 | -0.939507 |
| 6 | -3.327926 | -2.995430 | -1.665665 |
| 6 | -2.888542 | -2.164312 | -2.788791 |
| 6 | -3.619543 | -1.015056 | -3.137734 |
| 6 | -4.815979 | -0.651631 | -2.383322 |
| 6 | -4.857872 | 0.809941  | -2.274193 |
| 6 | -5.320357 | 1.412683  | -1.091631 |
| 6 | -5.754313 | 0.580892  | 0.031758  |
| 6 | -5.328890 | 1.236002  | 1.269666  |
| 6 | -4.875154 | 0.463017  | 2.352322  |
| 6 | -4.833771 | -0.998679 | 2.243242  |
| 6 | -5.247374 | -1.626206 | 1.055424  |
| 6 | -5.714134 | -0.819559 | -0.073049 |

# Supplementary Material (ESI) for Dalton Transactions  
# This journal is (c) The Royal Society of Chemistry 2011

|    |           |           |           |
|----|-----------|-----------|-----------|
| 6  | -5.238256 | -1.449186 | -1.305690 |
| 26 | 4.239085  | 0.150347  | 0.161975  |
| 8  | 2.986553  | -1.150058 | -0.062033 |
| 8  | 2.915859  | 1.398385  | 0.103136  |
| 8  | 4.715219  | 0.245814  | -1.400874 |
| 8  | 4.380576  | 0.066297  | 1.791023  |
| 7  | 5.779866  | -1.413881 | 0.224851  |
| 6  | 6.296739  | -1.826182 | 1.406047  |
| 6  | 6.168017  | -2.009612 | -0.927953 |
| 6  | 7.248989  | -2.856175 | 1.474309  |
| 1  | 5.918356  | -1.317186 | 2.286360  |
| 6  | 7.110163  | -3.051032 | -0.937918 |
| 1  | 5.707109  | -1.631377 | -1.834239 |
| 6  | 7.664736  | -3.479658 | 0.282677  |
| 1  | 7.644700  | -3.158753 | 2.438632  |
| 1  | 7.392883  | -3.510618 | -1.879904 |
| 1  | 8.397833  | -4.281957 | 0.305018  |
| 7  | 5.701262  | 1.778993  | 0.401531  |
| 6  | 6.344590  | 2.285348  | -0.676932 |
| 6  | 5.902657  | 2.323576  | 1.625507  |
| 6  | 7.235391  | 3.365133  | -0.563622 |
| 1  | 6.120931  | 1.806224  | -1.624747 |
| 6  | 6.776944  | 3.405660  | 1.816520  |
| 1  | 5.345434  | 1.871998  | 2.439703  |
| 6  | 7.458162  | 3.935177  | 0.704328  |
| 1  | 7.732845  | 3.745555  | -1.450300 |
| 1  | 6.910915  | 3.819197  | 2.811627  |
| 1  | 8.140511  | 4.773017  | 0.821889  |

-----  
SCF Done: E(RB+HF-LYP) = -3206.44415032 A.U.  
-----  
-----

[6,5]-Ru-Pro

-----  
Atomic Coordinates (Angstroms)  
Number X Y Z  
-----

# Supplementary Material (ESI) for Dalton Transactions  
# This journal is (c) The Royal Society of Chemistry 2011

|   |           |           |           |
|---|-----------|-----------|-----------|
| 6 | 1.323271  | 1.017173  | 0.307669  |
| 6 | 1.129694  | -0.483600 | 0.186096  |
| 6 | 0.566109  | 1.715558  | -0.841762 |
| 6 | -0.300452 | 2.753016  | -0.339079 |
| 6 | -0.375544 | 2.665088  | 1.096309  |
| 6 | 0.662298  | 1.672243  | 1.647578  |
| 6 | -0.026199 | 0.683600  | 2.563531  |
| 6 | 0.072274  | -0.697741 | 2.419136  |
| 6 | 0.649282  | -1.283126 | 1.222028  |
| 6 | 0.026104  | -2.504863 | 0.652734  |
| 6 | 0.123597  | -2.407256 | -0.794643 |
| 6 | 0.790622  | -1.139585 | -1.089288 |
| 6 | 0.374183  | -0.385430 | -2.185082 |
| 6 | 0.247518  | 1.085808  | -2.042532 |
| 6 | -0.918275 | 1.497084  | -2.808465 |
| 6 | -1.735645 | 2.548011  | -2.354052 |
| 6 | -1.420748 | 3.192654  | -1.092036 |
| 6 | -2.667549 | 3.501750  | -0.414499 |
| 6 | -2.742497 | 3.362795  | 0.983543  |
| 6 | -1.575911 | 2.945900  | 1.742376  |
| 6 | -2.052625 | 2.094532  | 2.859488  |
| 6 | -1.295543 | 0.988361  | 3.242079  |
| 6 | -1.965003 | -0.273425 | 3.551624  |
| 6 | -1.117675 | -1.337488 | 3.034989  |
| 6 | -1.689451 | -2.473163 | 2.464722  |
| 6 | -1.102468 | -3.072008 | 1.243215  |
| 6 | -2.198278 | -3.562324 | 0.416635  |
| 6 | -2.117822 | -3.457861 | -0.985045 |
| 6 | -0.933194 | -2.868595 | -1.602619 |
| 6 | -1.367645 | -2.075989 | -2.749233 |
| 6 | -0.728620 | -0.852492 | -3.024728 |
| 6 | -1.523498 | 0.309776  | -3.416518 |
| 6 | -2.919921 | 0.211704  | -3.523178 |
| 6 | -3.771238 | 1.297955  | -3.029698 |
| 6 | -3.190062 | 2.444043  | -2.462273 |
| 6 | -3.770309 | 3.037889  | -1.254510 |
| 6 | -4.907828 | 2.461583  | -0.664418 |
| 6 | -4.994135 | 2.334627  | 0.793298  |
| 6 | -3.935573 | 2.778176  | 1.600956  |
| 6 | -3.506922 | 1.989698  | 2.755416  |

# Supplementary Material (ESI) for Dalton Transactions  
# This journal is (c) The Royal Society of Chemistry 2011

|    |           |           |           |
|----|-----------|-----------|-----------|
| 6  | -4.157034 | 0.778001  | 3.057062  |
| 6  | -3.365551 | -0.381321 | 3.459544  |
| 6  | -3.965220 | -1.569416 | 2.858873  |
| 6  | -3.138904 | -2.601060 | 2.373456  |
| 6  | -3.455049 | -3.263106 | 1.106458  |
| 6  | -4.580888 | -2.863540 | 0.369260  |
| 6  | -4.494204 | -2.741196 | -1.087754 |
| 6  | -3.291701 | -3.034362 | -1.750424 |
| 6  | -2.827317 | -2.174119 | -2.842926 |
| 6  | -3.586296 | -1.057774 | -3.224563 |
| 6  | -4.843531 | -0.752627 | -2.535374 |
| 6  | -4.955315 | 0.699329  | -2.417961 |
| 6  | -5.513561 | 1.270800  | -1.255848 |
| 6  | -5.979488 | 0.410156  | -0.171052 |
| 6  | -5.663500 | 1.068597  | 1.099871  |
| 6  | -5.251941 | 0.306973  | 2.203742  |
| 6  | -5.134581 | -1.149630 | 2.084270  |
| 6  | -5.432918 | -1.780564 | 0.866112  |
| 6  | -5.867502 | -0.986203 | -0.285134 |
| 6  | -5.289326 | -1.578292 | -1.489096 |
| 44 | 3.389108  | 2.656357  | 1.538359  |
| 8  | 1.679598  | 2.398415  | 2.419870  |
| 8  | 2.762048  | 1.333588  | 0.241958  |
| 8  | 4.358100  | 1.600370  | 2.570293  |
| 8  | 3.003902  | 4.116689  | 0.619963  |
| 7  | 3.885648  | 4.174175  | 3.144047  |
| 6  | 3.676293  | 5.497462  | 2.928890  |
| 6  | 4.250966  | 3.740370  | 4.377415  |
| 6  | 3.840474  | 6.444464  | 3.950458  |
| 1  | 3.360559  | 5.763362  | 1.925657  |
| 6  | 4.425698  | 4.631105  | 5.447304  |
| 1  | 4.394784  | 2.670216  | 4.477534  |
| 6  | 4.219968  | 6.006696  | 5.233020  |
| 1  | 3.664265  | 7.494509  | 3.739818  |
| 1  | 4.708424  | 4.247073  | 6.422265  |
| 1  | 4.344917  | 6.717772  | 6.045196  |
| 7  | 5.412473  | 2.970931  | 0.533237  |
| 6  | 6.492354  | 2.247007  | 0.926311  |
| 6  | 5.554478  | 3.915108  | -0.433041 |
| 6  | 7.765770  | 2.462943  | 0.375331  |

# Supplementary Material (ESI) for Dalton Transactions  
# This journal is (c) The Royal Society of Chemistry 2011

|   |          |          |           |
|---|----------|----------|-----------|
| 1 | 6.304927 | 1.507293 | 1.697006  |
| 6 | 6.798012 | 4.184074 | -1.026672 |
| 1 | 4.649933 | 4.449921 | -0.701200 |
| 6 | 7.926473 | 3.451973 | -0.613091 |
| 1 | 8.605484 | 1.868667 | 0.721502  |
| 1 | 6.871634 | 4.952581 | -1.790022 |
| 1 | 8.903656 | 3.646810 | -1.048968 |

-----  
SCF Done: E(RB+HF-LYP) = -3176.94920089 A.U.  
-----  
-----

[6,6]-Ru-Pro

-----

| Atomic<br>Number | Coordinates (Angstroms) |           |           |
|------------------|-------------------------|-----------|-----------|
|                  | X                       | Y         | Z         |
| 6                | 1.490116                | 0.876495  | 0.147114  |
| 6                | 1.534208                | -0.721185 | 0.034045  |
| 6                | 0.741411                | 1.581294  | -1.003676 |
| 6                | -0.041223               | 2.679998  | -0.484379 |
| 6                | -0.069690               | 2.573545  | 0.976478  |
| 6                | 0.696907                | 1.409302  | 1.361655  |
| 6                | 0.258255                | 0.621221  | 2.412402  |
| 6                | 0.299103                | -0.863450 | 2.305436  |
| 6                | 0.772945                | -1.464727 | 1.152483  |
| 6                | 0.074125                | -2.603078 | 0.600248  |
| 6                | 0.104731                | -2.497087 | -0.860589 |
| 6                | 0.825774                | -1.294157 | -1.213186 |
| 6                | 0.392978                | -0.528412 | -2.282828 |
| 6                | 0.350967                | 0.956434  | -2.175533 |
| 6                | -0.828126               | 1.416663  | -2.895926 |
| 6                | -1.574762               | 2.508779  | -2.413905 |
| 6                | -1.171088               | 3.156025  | -1.175883 |
| 6                | -2.380838               | 3.527969  | -0.438415 |
| 6                | -2.408795               | 3.425246  | 0.960493  |
| 6                | -1.228500               | 2.946499  | 1.683827  |
| 6                | -1.679629               | 2.127913  | 2.798003  |

# Supplementary Material (ESI) for Dalton Transactions  
# This journal is (c) The Royal Society of Chemistry 2011

|    |           |           |           |
|----|-----------|-----------|-----------|
| 6  | -0.949517 | 0.975052  | 3.144721  |
| 6  | -1.655834 | -0.257599 | 3.492178  |
| 6  | -0.884377 | -1.386250 | 2.973544  |
| 6  | -1.550162 | -2.515738 | 2.460153  |
| 6  | -1.058391 | -3.139409 | 1.241756  |
| 6  | -2.213241 | -3.573474 | 0.452182  |
| 6  | -2.184673 | -3.470755 | -0.946747 |
| 6  | -1.000500 | -2.929722 | -1.617853 |
| 6  | -1.444345 | -2.134579 | -2.751864 |
| 6  | -0.761472 | -0.944432 | -3.067199 |
| 6  | -1.515600 | 0.249635  | -3.446355 |
| 6  | -2.918099 | 0.213974  | -3.494214 |
| 6  | -3.694552 | 1.344284  | -2.979197 |
| 6  | -3.035583 | 2.468041  | -2.450538 |
| 6  | -3.536182 | 3.100459  | -1.227817 |
| 6  | -4.673999 | 2.583188  | -0.584701 |
| 6  | -4.702957 | 2.476361  | 0.875336  |
| 6  | -3.593189 | 2.890398  | 1.632234  |
| 6  | -3.141023 | 2.086184  | 2.769872  |
| 6  | -3.817859 | 0.899281  | 3.101563  |
| 6  | -3.059009 | -0.295897 | 3.476950  |
| 6  | -3.751566 | -1.464894 | 2.930049  |
| 6  | -3.011284 | -2.551633 | 2.432331  |
| 6  | -3.423068 | -3.208030 | 1.189522  |
| 6  | -4.556955 | -2.751289 | 0.495938  |
| 6  | -4.527170 | -2.644404 | -0.964208 |
| 6  | -3.364747 | -2.998280 | -1.670799 |
| 6  | -2.905715 | -2.170013 | -2.788152 |
| 6  | -3.628883 | -1.020088 | -3.150925 |
| 6  | -4.836760 | -0.653222 | -2.416791 |
| 6  | -4.877787 | 0.808618  | -2.311042 |
| 6  | -5.358520 | 1.414329  | -1.137295 |
| 6  | -5.812288 | 0.585370  | -0.019643 |
| 6  | -5.405960 | 1.242008  | 1.223879  |
| 6  | -4.971510 | 0.470236  | 2.315316  |
| 6  | -4.930924 | -0.991788 | 2.209447  |
| 6  | -5.326063 | -1.620797 | 1.016104  |
| 6  | -5.772749 | -0.815373 | -0.121274 |
| 6  | -5.278104 | -1.448112 | -1.344843 |
| 44 | 4.309380  | 0.145100  | 0.214339  |



# Supplementary Material (ESI) for Dalton Transactions  
# This journal is (c) The Royal Society of Chemistry 2011

|   |          |           |           |
|---|----------|-----------|-----------|
| 8 | 2.926737 | -1.202534 | 0.040915  |
| 8 | 2.855535 | 1.427835  | 0.203067  |
| 8 | 4.785198 | 0.245722  | -1.485173 |
| 8 | 4.568308 | 0.061429  | 1.961252  |
| 7 | 5.930615 | -1.447936 | 0.230261  |
| 6 | 6.407580 | -1.933692 | 1.404923  |
| 6 | 6.372095 | -1.971328 | -0.942343 |
| 6 | 7.362210 | -2.961666 | 1.444369  |
| 1 | 5.996188 | -1.478351 | 2.299138  |
| 6 | 7.322370 | -3.003609 | -0.977115 |
| 1 | 5.945979 | -1.538197 | -1.840606 |
| 6 | 7.830131 | -3.507750 | 0.234793  |
| 1 | 7.720339 | -3.322674 | 2.403359  |
| 1 | 7.647333 | -3.399302 | -1.934103 |
| 1 | 8.566561 | -4.307413 | 0.236635  |
| 7 | 5.837313 | 1.817821  | 0.399437  |
| 6 | 6.400444 | 2.357195  | -0.711932 |
| 6 | 6.127579 | 2.337549  | 1.620045  |
| 6 | 7.291721 | 3.438454  | -0.635478 |
| 1 | 6.112178 | 1.898451  | -1.651634 |
| 6 | 7.008507 | 3.419423  | 1.770072  |
| 1 | 5.635503 | 1.862303  | 2.461485  |
| 6 | 7.604110 | 3.980468  | 0.625270  |
| 1 | 7.721371 | 3.842470  | -1.546595 |
| 1 | 7.213156 | 3.809087  | 2.762362  |
| 1 | 8.288767 | 4.820146  | 0.712811  |

-----  
SCF Done: E(RB+HF-LYP) = -3176.97950395 A.U.  
-----  
-----

[6,5]-Os-Pro

-----  
Atomic Coordinates (Angstroms)  
Number X Y Z  
-----  
6 1.294297 1.095669 0.313335  
6 1.130760 -0.407336 0.198203

# Supplementary Material (ESI) for Dalton Transactions  
# This journal is (c) The Royal Society of Chemistry 2011

|   |           |           |           |
|---|-----------|-----------|-----------|
| 6 | 0.531858  | 1.777684  | -0.839825 |
| 6 | -0.355868 | 2.800062  | -0.343465 |
| 6 | -0.434256 | 2.716860  | 1.092624  |
| 6 | 0.620452  | 1.745542  | 1.650547  |
| 6 | -0.052239 | 0.746278  | 2.567492  |
| 6 | 0.070677  | -0.633639 | 2.426596  |
| 6 | 0.663533  | -1.213130 | 1.234340  |
| 6 | 0.066853  | -2.448484 | 0.665808  |
| 6 | 0.169079  | -2.353165 | -0.781612 |
| 6 | 0.811480  | -1.073093 | -1.076466 |
| 6 | 0.387333  | -0.330390 | -2.177110 |
| 6 | 0.230916  | 1.138427  | -2.039607 |
| 6 | -0.937887 | 1.525282  | -2.813015 |
| 6 | -1.777113 | 2.561527  | -2.365205 |
| 6 | -1.480534 | 3.216104  | -1.103574 |
| 6 | -2.736454 | 3.502948  | -0.433122 |
| 6 | -2.814900 | 3.366579  | 0.964719  |
| 6 | -1.643882 | 2.974991  | 1.730498  |
| 6 | -2.109322 | 2.118094  | 2.848089  |
| 6 | -1.332567 | 1.027864  | 3.236803  |
| 6 | -1.979985 | -0.245425 | 3.546990  |
| 6 | -1.110230 | -1.294396 | 3.037781  |
| 6 | -1.657419 | -2.443162 | 2.469145  |
| 6 | -1.053497 | -3.034980 | 1.252506  |
| 6 | -2.135673 | -3.548532 | 0.421918  |
| 6 | -2.050598 | -3.446935 | -0.979754 |
| 6 | -0.874592 | -2.836817 | -1.593416 |
| 6 | -1.318529 | -2.055962 | -2.744591 |
| 6 | -0.701834 | -0.821129 | -3.021018 |
| 6 | -1.516996 | 0.324658  | -3.420359 |
| 6 | -2.910777 | 0.199379  | -3.533135 |
| 6 | -3.785144 | 1.270548  | -3.046997 |
| 6 | -3.228699 | 2.429278  | -2.480247 |
| 6 | -3.825856 | 3.015316  | -1.277035 |
| 6 | -4.954977 | 2.419269  | -0.690689 |
| 6 | -5.045714 | 2.295011  | 0.766948  |
| 6 | -3.999265 | 2.760895  | 1.578076  |
| 6 | -3.560970 | 1.984510  | 2.736941  |
| 6 | -4.189717 | 0.761783  | 3.039227  |
| 6 | -3.377853 | -0.380769 | 3.448824  |

# Supplementary Material (ESI) for Dalton Transactions  
# This journal is (c) The Royal Society of Chemistry 2011

|    |           |           |           |
|----|-----------|-----------|-----------|
| 6  | -3.951837 | -1.582015 | 2.849331  |
| 6  | -3.103635 | -2.599099 | 2.371103  |
| 6  | -3.401139 | -3.271181 | 1.104683  |
| 6  | -4.530975 | -2.895517 | 0.360836  |
| 6  | -4.439666 | -2.775936 | -1.096085 |
| 6  | -3.228601 | -3.048183 | -1.752041 |
| 6  | -2.775519 | -2.182295 | -2.844959 |
| 6  | -3.553832 | -1.081801 | -3.233711 |
| 6  | -4.820217 | -0.798810 | -2.551697 |
| 6  | -4.960564 | 0.651139  | -2.439209 |
| 6  | -5.535232 | 1.215401  | -1.281499 |
| 6  | -5.989463 | 0.349127  | -0.196300 |
| 6  | -5.692169 | 1.017262  | 1.074026  |
| 6  | -5.271261 | 0.267149  | 2.182181  |
| 6  | -5.125263 | -1.187248 | 2.067779  |
| 6  | -5.405922 | -1.827562 | 0.850323  |
| 6  | -5.850341 | -1.045244 | -0.305534 |
| 6  | -5.254877 | -1.629659 | -1.504830 |
| 76 | 3.375897  | 2.731223  | 1.571247  |
| 8  | 1.631039  | 2.501519  | 2.411896  |
| 8  | 2.729582  | 1.441776  | 0.245822  |
| 8  | 4.276729  | 1.597740  | 2.600915  |
| 8  | 2.998828  | 4.207768  | 0.654133  |
| 7  | 3.923171  | 4.191663  | 3.162395  |
| 6  | 3.706960  | 5.522589  | 2.979221  |
| 6  | 4.341357  | 3.741708  | 4.377301  |
| 6  | 3.914137  | 6.450671  | 4.008624  |
| 1  | 3.351879  | 5.805262  | 1.994535  |
| 6  | 4.562136  | 4.617285  | 5.449543  |
| 1  | 4.485347  | 2.670452  | 4.455845  |
| 6  | 4.346972  | 5.995707  | 5.267854  |
| 1  | 3.728084  | 7.503224  | 3.820770  |
| 1  | 4.886971  | 4.217079  | 6.404720  |
| 1  | 4.504729  | 6.694062  | 6.085417  |
| 7  | 5.366751  | 2.984926  | 0.590465  |
| 6  | 6.427448  | 2.220507  | 0.970945  |
| 6  | 5.524151  | 3.893513  | -0.411336 |
| 6  | 7.688316  | 2.358861  | 0.371986  |
| 1  | 6.227643  | 1.507118  | 1.762237  |
| 6  | 6.757792  | 4.079112  | -1.052084 |

# Supplementary Material (ESI) for Dalton Transactions  
# This journal is (c) The Royal Society of Chemistry 2011

|   |          |          |           |
|---|----------|----------|-----------|
| 1 | 4.637360 | 4.460619 | -0.670132 |
| 6 | 7.863581 | 3.305144 | -0.654542 |
| 1 | 8.508534 | 1.732767 | 0.708695  |
| 1 | 6.839743 | 4.816125 | -1.844716 |
| 1 | 8.831925 | 3.433492 | -1.132599 |

-----  
SCF Done: E(RB+HF-LYP) = -3174.19316302 A.U.  
-----  
-----

[6,6]-Os-Pro

-----

| Atomic<br>Number | Coordinates (Angstroms) |           |           |
|------------------|-------------------------|-----------|-----------|
|                  | X                       | Y         | Z         |
| 6                | 1.481016                | 0.873559  | 0.156020  |
| 6                | 1.524384                | -0.724677 | 0.043295  |
| 6                | 0.737091                | 1.578399  | -0.996542 |
| 6                | -0.046314               | 2.677548  | -0.479323 |
| 6                | -0.077971               | 2.571529  | 0.981487  |
| 6                | 0.687287                | 1.407131  | 1.368379  |
| 6                | 0.245708                | 0.619683  | 2.418286  |
| 6                | 0.285614                | -0.865097 | 2.311720  |
| 6                | 0.761851                | -1.467119 | 1.160161  |
| 6                | 0.062656                | -2.604603 | 0.606876  |
| 6                | 0.096351                | -2.498907 | -0.853868 |
| 6                | 0.819533                | -1.296937 | -1.205118 |
| 6                | 0.389218                | -0.531242 | -2.275716 |
| 6                | 0.348147                | 0.953629  | -2.168849 |
| 6                | -0.829000               | 1.414628  | -2.891796 |
| 6                | -1.575868               | 2.507615  | -2.411920 |
| 6                | -1.174307               | 3.154772  | -1.173325 |
| 6                | -2.385273               | 3.527850  | -0.438310 |
| 6                | -2.416194               | 3.425497  | 0.960595  |
| 6                | -1.237805               | 2.945980  | 1.686531  |
| 6                | -1.691739               | 2.128166  | 2.799940  |
| 6                | -0.963179               | 0.974689  | 3.148157  |
| 6                | -1.671199               | -0.257365 | 3.494542  |

# Supplementary Material (ESI) for Dalton Transactions  
# This journal is (c) The Royal Society of Chemistry 2011

|    |           |           |           |
|----|-----------|-----------|-----------|
| 6  | -0.899540 | -1.386809 | 2.977689  |
| 6  | -1.565224 | -2.516020 | 2.463411  |
| 6  | -1.071521 | -3.140218 | 1.246232  |
| 6  | -2.225081 | -3.573505 | 0.454357  |
| 6  | -2.193573 | -3.471134 | -0.944533 |
| 6  | -1.007591 | -2.931228 | -1.613417 |
| 6  | -1.448415 | -2.136113 | -2.748443 |
| 6  | -0.763865 | -0.946503 | -3.062369 |
| 6  | -1.516327 | 0.248050  | -3.443419 |
| 6  | -2.918769 | 0.213519  | -3.494319 |
| 6  | -3.695469 | 1.344596  | -2.981267 |
| 6  | -3.036707 | 2.467980  | -2.451549 |
| 6  | -3.539374 | 3.101091  | -1.229981 |
| 6  | -4.678949 | 2.584882  | -0.589044 |
| 6  | -4.710987 | 2.478429  | 0.871010  |
| 6  | -3.602408 | 2.891784  | 1.630076  |
| 6  | -3.153152 | 2.087489  | 2.768838  |
| 6  | -3.831595 | 0.901191  | 3.099473  |
| 6  | -3.074398 | -0.294546 | 3.476632  |
| 6  | -3.766825 | -1.463160 | 2.928616  |
| 6  | -3.026374 | -2.550630 | 2.432661  |
| 6  | -3.436159 | -3.206953 | 1.189146  |
| 6  | -4.568316 | -2.749491 | 0.493152  |
| 6  | -4.535470 | -2.642988 | -0.967003 |
| 6  | -3.371836 | -2.997933 | -1.671127 |
| 6  | -2.909803 | -2.170310 | -2.787751 |
| 6  | -3.631324 | -1.019895 | -3.152265 |
| 6  | -4.840395 | -0.651897 | -2.420669 |
| 6  | -4.880466 | 0.810030  | -2.315366 |
| 6  | -5.363210 | 1.416405  | -1.142742 |
| 6  | -5.819941 | 0.588076  | -0.025803 |
| 6  | -5.415644 | 1.244702  | 1.218422  |
| 6  | -4.983974 | 0.472847  | 2.310962  |
| 6  | -4.944324 | -0.989263 | 2.205498  |
| 6  | -5.337590 | -1.618259 | 1.011481  |
| 6  | -5.781277 | -0.812735 | -0.127020 |
| 6  | -5.284668 | -1.446180 | -1.349441 |
| 76 | 4.323033  | 0.141802  | 0.216221  |
| 8  | 2.920832  | -1.201718 | 0.054218  |
| 8  | 2.851039  | 1.418780  | 0.216767  |

# Supplementary Material (ESI) for Dalton Transactions  
# This journal is (c) The Royal Society of Chemistry 2011

|   |          |           |           |
|---|----------|-----------|-----------|
| 8 | 4.741099 | 0.242329  | -1.508744 |
| 8 | 4.541968 | 0.056028  | 1.979072  |
| 7 | 5.937652 | -1.397393 | 0.232239  |
| 6 | 6.407841 | -1.893401 | 1.409680  |
| 6 | 6.407260 | -1.903211 | -0.941327 |
| 6 | 7.377723 | -2.905054 | 1.448305  |
| 1 | 5.975147 | -1.457737 | 2.302935  |
| 6 | 7.374485 | -2.917784 | -0.971338 |
| 1 | 5.984596 | -1.469020 | -1.840133 |
| 6 | 7.873624 | -3.429451 | 0.240701  |
| 1 | 7.726133 | -3.271263 | 2.408911  |
| 1 | 7.718991 | -3.295412 | -1.928620 |
| 1 | 8.622670 | -4.217214 | 0.244184  |
| 7 | 5.842495 | 1.764951  | 0.390367  |
| 6 | 6.397757 | 2.312013  | -0.725633 |
| 6 | 6.159043 | 2.273793  | 1.612922  |
| 6 | 7.302015 | 3.380487  | -0.650101 |
| 1 | 6.087241 | 1.869243  | -1.665152 |
| 6 | 7.054862 | 3.342422  | 1.756549  |
| 1 | 5.672151 | 1.798917  | 2.456868  |
| 6 | 7.640944 | 3.907982  | 0.609488  |
| 1 | 7.721448 | 3.787350  | -1.564576 |
| 1 | 7.277613 | 3.719514  | 2.749608  |
| 1 | 8.336333 | 4.738946  | 0.694275  |

-----  
SCF Done: E(RB+HF-LYP) = -3174.22288909 A.U.  
-----  
-----
